# Supplementary material
Source: PubMed Central journal article supplement (PMC164620)
Supplement: pnas_0932632100_1.pdf [file pnas_0932632100_1.pdf]

FTM1 >Fugu thrombomodulin on Scaffold\_195

(sequence length=542)

HTM1 >gi|1070535|thrombomodulin precursor [validated] - human

(sequence length=575)

Number of matches = 202

Fraction of identities per length = 0.372694

```
M N D V T R L I A I   V C A L L W G R T G G V K P N N I Y C
M_L G V_L V L_G A_L A L A G L_G F P A P A E P Q P_G G S Q C_

I G N Q C F T V S K I L G D F S A A Q S E C Q D R G G N L M
V E H D C_F_A L Y P G P A T F_L N A_S Q I C_D G L R G_H L_M_

T V R S S V A H D V L L M L L           G D A S S R F W I G L
T_V_R_S_S_V_A_A D_V_I S L L_L_N G D G G_V G R R R_L W_I_G_L_

H L P T G C           P D R S A E L K G F L W V A G D N E S D F S
Q L_P_P G_C_G D P_K R_L G P L_R G_F_Q W_V_T G_D_N_N T S Y S_

N W P T   T F N S S           C S S H R C V S V S P A D G F
R_W_A R L D L_N_G A P L C_G P L   C_V_A V_S_A A_E A T V P S

      K W T R E P C D T R T D G F L C E Y S F N E T C N S L E
E P I W_E E Q Q_C_E V K A D_G_F_L_C_E_F H F_P A T_C_R P L_A

A G A G E           T L T Y S T P I G F E G E D L L S L P P
V E P G_A A A A A V S I T_Y_G T_P_F A A R G_A D_F Q A L_P_V

G S T A V R M P T E T K Y I C           F S G Q W T Q
G_S_S A_A V A P_L G L Q L M C_T A P P G A V Q G_H W_A R E A

      A P W N C D V L G G G C E Y K C T Q D P E K M P L C Y C P
P G A W_D_C_S V_E N G_G_C_E_H A C_N A I P_G   A P_R C_Q C_P_

R G K T I N P E N E V T C E E T Q E D P C A S L R C A H I C
A_G_A A L Q A D G R   S C_T A S A T Q S C_N D L_ C_E H_F C_

Y           E N G G S F A C T C R E G F K L A A D G R S C V D F
V P N P D Q P G_S_Y S C_M C_E T G_Y R L_A_A_D_Q H R C_E D_V

N D C T   D P R Q C P G E N S R C V N T A G G F Q C V C K D
D_D_C_I L E P_S P_C_P_           Q R_C_V_N_T_Q G_G_F_E C_H_C_Y P

G Y R Y K G G V C V D   V N E C T S A P C E H M C D N L   P
N_Y_D L V D G_E C_V_E P V_D P_C_F R A_N C_E_Y Q C_Q P L_N Q

G S Y V C S C Y P G Y K E D P E E P H R C K L Y C G E E E C
T_S_Y_L_C_V_C_A E G_F A P I P_H E_P_H_R_C_Q M F C_N Q T A C_

L A E C D P N D R Y Q C F C P E G Y I L E E R Q Q D A V C L
P_A_D_C_D_P_N_T Q A S C_E C_P_E_G_Y_I_L_D D           G F I C_T

D I D E C   S S F Y C D Q D C E N T Y G S Y V C I C S P G Y
D_I_D_E_C_E N G G F C_S G V C_H N_L P G_T F E C_I_C_G P_D S

K L V D N Y           K C V K N E V G P D E G S G A S S T P P S L
```

A L\_V\_R H I G T D C\_D S G K V\_D G G D S\_G\_S G E P P\_P\_S\_P  
T T E P P D A T I Q P S I L T R G G I V G I V L C T L F I  
T\_P G S T L T P P A V G L V H S G\_L L I G\_I\_S I A S L\_C L V  
T A L L M F L A Y R V L C G K G K M E S A D G V K A S  
V A\_L\_L\_A L L\_C H L R K K Q G A A R A K\_M\_E\_Y K C A A P S K  
E N E A H T L Q P V T S D A  
E\_V V L Q H V R T E R T P Q R L

FTFI >fugu TFPI on scaff611, from tbn

(sequence length=288)

TFPI >gi|125932|sp|human Tissue factor pathway inhibitor (TFPI)

(sequence length=304)

Number of matches = 102

Fraction of identities per length = 0.354167

M I F N S P D P Q G N Q T L L N Y P G E I S S V Y  
M\_I\_Y T M K K V H A L W A S V C L L\_L\_N\_L A P\_A P L N A D S  
L K T H K L H L L Q I \ / P E H L I F N E L C A L K D E K  
E E D E E H T I I T \ / D T E L P\_P L K L M H S F C\_A\_F K\_A D D  
G P C K A I K D R F F F N V D N G H C E L F E Y G G C G G N  
G\_P\_C\_K\_A\_I\_M K R\_F\_F\_F\_N\_I F T R Q C\_E\_E F\_I Y\_G\_G\_C\_E\_G\_N\_  
A N N F E T L E E C E E T C V V S G K S H D K \ / Y  
Q\_N\_R\_F\_E\_S L\_E\_E\_C\_K K M C\_T R D N A N R I I K T T L Q Q \ / E  
N K T P C H L S E A P G P C R G L L S R Y Y Y D S R S Q Q C  
K P D F C\_F L\_E\_E\_D P\_G\_I C\_R\_G\_Y I T R\_Y\_F Y\_N N Q T K Q\_C\_  
T H F F Y G G C F G N A N N F R S M A E C Q A K C Q S  
E R F\_K\_Y\_G\_G\_C\_L G\_N\_M N\_N\_F\_E T L E E\_C\_K N I C\_E D G P \ / N  
P \ / D N V N K N M I S N N T S L S A Q T E A I N Q D M I  
G F Q V D\_N\_Y G T Q L N A V N\_N S\_L\_T P Q\_S T K V P S L F  
P \ / Y V K P T D L C S F P T D P G T C D G K E R R F T Y N S I  
E F H G P\_S W\_C\_L T P\_A D\_R\_G\_L C\_R A N E\_N R\_F\_Y Y\_N\_S\_V  
T K R C Q A F I Y S G C G G N E N N F V F R K N C I A K C K  
I G K C\_R P F\_K Y\_S\_G\_C\_G\_G\_N\_E\_N\_N\_F\_T S K Q E C\_L R A C\_K\_  
A A R K \ / Q K K K R E K N E K S A E S Q K S D V A F N R R N  
K \ / G F I Q\_R I S K G G L I K\_T K R K R K\_K Q R V\_K I A Y E E  
E L L H L L D P A  
I F V K N M

FTM2 >fugu thrombomodulin candidata2 on Scaffold195

(sequence length=472)

HTM1 >gi|1070535|thrombomodulin precursor [validated] - human

(sequence length=575)

Number of matches = 138

Fraction of identities per length = 0.292373

M S P S A N P C L L V L V F L C G L E E A L L S H S G R  
M\_L G V L V L G A L\_A L\_A G L\_ G\_F P A P A E P Q P G\_G S Q  
C T D N R C V A V F V D S T D F P G A Q K S C K S F N G Q L  
C\_V E H D C\_F A\_L Y P G P A T F\_L N A\_S Q I C\_D G L R G\_H L\_  
F K Y N M T T L A D I F K L L P S G K L W  
M T V R S S V A A\_D\_V I S L\_L\_L N G\_D G G V G R R R L\_W\_I G  
L E Q Q E A V A T P Q N  
L\_Q L P P G C G D P\_K R L G P L R G F Q W V T G D N N T S Y  
C S S I A V S T D S F A  
S R W A R L D L N G A P L C G P L C\_V A V S A A E A T V P S  
Q S W E P C H K N L S G Y L C Q Y P L T N P C G P V K  
E P I W\_E\_E Q Q C\_E V K A D G\_F L\_C\_E F H F P A T C\_R P\_L A  
V A G A P Q V V Y T A P M D F E V R D S Q T F P E  
V\_E P G A A A\_A A\_V S I T Y\_G T P\_F A A R G A D\_F Q\_A L P\_V  
G T T A M V I T A G D K H L E S K H V C F G D Q W L K  
G\_S S A\_A V\_A P L G\_L Q L M C T A P P G A V Q G H W\_A R E A  
A P W N C E V M L G G C E R G C N K T T N T C T C P G  
P G A W\_D C\_S V\_E N G\_G\_C\_E\_H A C\_N\_A I P G A P R C\_Q C\_P\_A  
E Q S L N S N G V T C  
G A A L\_Q A D G\_R S C\_T A S A T Q S C N D L C E H F C V P N  
E D V N K C E D S A L C  
P D Q P G S Y S C M C E T G Y R L A A D\_Q H R C\_E\_D\_V D D C\_  
T R A G E V C V K K E G G F E C V C R N G F I E E E  
I L E P S P C P Q R C\_V\_N T Q G\_G\_F\_E\_C\_H C\_Y P N Y D L V D  
G V C V N N S I C F E C E H P L C V K R Q G V Y K C A  
G\_E C\_V\_E P V D P C\_F\_R A N C\_E\_Y Q C Q P L N Q\_T S\_Y\_L C\_V  
C Y E G Y Q V R V G D L T K C D R L C T E R Q C L A S C D R  
C\_A E\_G\_F A P I P H E P H R C\_Q M F C\_N Q T A C\_P A\_D C\_D\_P  
N A E S N V Q C F C P T G F I L D T S N G S N I C T D I D E  
N\_T Q A S C\_E C\_P\_E G\_Y I\_L\_D D G F I\_C\_T\_D\_I\_D\_E\_  
C D M G K Q C E H T C V N L F G G F R C G C F E G F R L  
C\_E N G\_G F C\_S G V C\_H N\_L\_P G\_T F\_E C\_I C\_G P D S A L\_V R  
H G E H Q C L P V D D G Q E D G S S S T A S Y L I P V T P  
H\_I G T D C\_D S G K V D\_G\_G D S G\_S\_G E P P P S P T P\_G S T  
Q P A L V P S Y I K A G S V L G I T V F L L L C A T L I F F

L T P P A V G L V H S G\_L L I G\_I\_S I A S L\_C\_L V V A L L  
L I Y N A V K R C R R F D L T S L K H T N I D I F H L  
A L\_L C H L R K\_K Q G A A R\_A K M E Y K C A A P S K E V V L\_  
Q Q V T T D T Y K R L S L  
Q\_H V\_R T\_E R T P Q R L\_

FTFI >fugu tissue factor inhibitor on scaff1267  
(sequence length=241)  
TFI2 >gi|5730091| tissue factor pathway inhibitor 2 [Homo sapiens]  
(sequence length=235)

Number of matches = 103  
Fraction of identities per length = 0.438298

M D S I G N E F I S G I L V L L E V T K E V G T V R Q E A Q  
M\_D\_P A R P L G L S I\_L\_L L\_F L T E A A L G\_D A A Q\_E\_P T  
R K S S E E I Y G \ / S V C L L Q V D E G P C R G D I E R Y Y Y  
\ / G N N A E\_ I C\_L\_L\_P L D\_Y G\_P\_C\_R\_A L L L R\_Y\_Y\_Y\_  
N T I T Q K C E L F S Y G G C Q G N A N N F K S Y Q E C Q K  
D R Y T\_Q\_S\_C\_R Q F\_L Y\_G\_G\_C\_E G\_N\_A\_N\_N\_F\_Y T W E A C\_D D  
T C F R I P \ / K V P Q I C R F P S E V G P C R A L L R K Y F  
A C\_W\_R\_I\_E \ / K\_V\_P\_K V C\_R\_L Q V S V\_D D Q\_C\_E\_G S T E K\_Y\_F\_  
F N M T S M Q C E L F Y Y G G C L G N S N R F G D R A S  
F\_N\_L S S\_M\_T C\_E\_K F\_F S G\_G\_C\_H R N\_R I E N\_R\_F\_P D E A T  
C E E Y C S P K K \ / S L P V L C L D P L D K G K C S A S I P R  
C\_M\_G F\_C\_A\_P\_K\_K\_ \ / I P\_S F\_C\_Y S P\_K D\_E\_G\_L\_C\_S\_A\_N V T R\_  
Y Y Y N A A T K R C E E F A Y S G C G G S S N N F V S R Q S  
Y\_Y\_F\_N\_P\_R Y R T C\_D A F\_T Y\_T G\_C\_G\_G\_N D N\_N\_F\_V\_S\_R\_E D  
C K D V C V R \ / G R K I R T R E G K T V P L R R N R N N R I T  
C\_K\_R A C\_A K \ / A L K\_K K K K M P K\_L R F A S R\_I R\_K I R\_K K  
F M Q A  
Q F

FALF >part of the genscan of alpha on Scaffold\_3291  
(sequence length=697)  
FALC >gi|971185|gb|AAB60686.1| fibrinogen alpha-E subunit [Gallus gallus]  
(sequence length=741)

Number of matches = 258  
Fraction of identities per length = 0.370158

M E R V T L L V Y L T L Y C A A F V V \ / V G S  
M\_I P V\_T\_I L C V L\_L C L\_N L\_A W A Q D G K T T F\_E K E\_G\_G  
L D P R G A R P V E P S T R S E K C A S Q K E W P F C S D D

GGR\_G\_P\_R\_I\_L\_E\_ N M H E S S C\_K\_Y\_E\_K\_N\_W\_P\_I\_C\_V\_D\_D\_  
D\_W\_G\_ \ / P K C P S G C R I Q G L M D K H D I D L L K K I E K I  
D\_W\_G\_ T K\_C\_P\_S\_C C\_R\_M\_Q\_G\_I I D D T D\_Q\_N\_Y\_S\_Q\_R\_I\_D\_N\_I\_  
R N L L D Q N K A K F R S A D Q V S E Q T Y N Y L K E K L T  
R\_Q\_Q\_L\_A\_D\_S\_Q\_N\_K\_Y\_K\_T\_S\_N\_R\_V\_I\_V\_E\_T\_I\_N\_I\_L\_K\_P\_G\_L\_E  
\ / Q N V H Q N I S Y Q Y T Q Y T L A K L L D S \ / D P S L Q  
G A Q Q L D E N Y\_G H V S T E L\_R R R I V T L\_K\_Q R V A T Q\_  
R G S Q T H R A H T Y A G Q S P G L R K R \ / Q V D I D I K L R  
V N R I K A L Q N S I Q E Q\_V V E M K R L E V\_D\_I\_D\_I\_K\_I\_R\_  
S C K G S C E R Y S A Y Q M E V G S Y V A L E K Q \ / L T Q L D  
A\_C\_K\_G\_S\_C\_A\_R\_S F D Y\_Q\_V D K E G Y\_D N I Q\_K\_H L\_T\_Q\_A\_S  
S Q S A Q R V E S V K T L Y V M K S R P L K D D P V D S L L  
S\_I\_D\_M\_H\_P\_D\_F\_Q\_T\_T\_T\_L\_S\_T\_L\_K\_M\_R\_P\_L\_K\_D\_S\_N\_V\_P\_E\_H\_F  
K S K P V D G Q Q R E D M F H E V R P S P Y F F N I P N L P  
K\_L\_K\_P\_S\_P\_E\_M\_Q\_A\_M\_S\_A\_F\_N\_N\_I\_K\_Q\_M\_Q\_V\_V\_L\_E\_R\_P\_E\_T\_D  
S F L F S Q I F K V F \ / I S T V K L I L E Q E G S S S S S P A T  
H V A E A R G D S S P S H T\_G\_K\_L\_I\_T\_S\_S H R R E S\_P\_S\_L  
V S K L P G T S Y S S T R S S P S V A T S S K  
V\_D\_K\_T\_S\_S\_A\_S\_S\_V\_H\_R\_C\_T\_R\_T\_V\_T\_K\_K\_V\_I\_S\_G\_P\_D\_G\_P\_R\_E  
S I T E L S G Q G G G G L F D G G F D G  
E\_I\_V\_E\_K\_M\_V\_S\_S\_D\_G\_S\_D\_C\_S\_H\_L\_Q\_G\_G\_R\_E\_G\_S\_T\_Y\_H\_F\_S\_G\_  
M S S K T H I S T K M A E C T K R I K T T I I H T K E G  
T G D F H K L D R L L P D L E S F F T H D S V S T\_S S R H S  
P V E Q R E E V V E G G P E C Q T A T D F S K G E L S S L  
I G S S T S S H V\_T\_G\_A\_G\_S\_S\_H\_L\_G\_T\_G G K\_D\_K\_F\_T\_D\_L\_G  
F P T L T Q T S S S S S S S S S S S S S S S S S S S S S S  
E E E E D D F\_G G L\_Q P S G F A A G S\_A S\_H S\_K T V L T S\_S\_  
S S S I H P G G A K G S L L G S S K A I L V D P F D F G A F  
S\_S\_S\_F\_N\_K\_G\_G\_ S T F E T K S\_L K T R E T S E Q L G\_G V  
T T A N A D D D L P D L H A R S V K S T H V K R N A D Y V G  
Q H D Q S A E D\_T\_P\_D\_F\_K\_A\_R\_S\_F R P A A M S T R R S Y\_N\_G\_  
K \ / D C V E A H Q Y H L K G E T N G L F Q I R P G G T Q S D Q  
K\_ D\_C\_D D I R Q\_K\_H\_T S\_G\_A\_K\_S\_G\_I\_F\_K\_I\_K\_P\_E\_G\_ S\_N K  
V V E V Y C Q Q E G L M G G W L L V Q Q R E S G A V S F N Q  
V\_L\_S\_V\_Y\_C\_D\_Q\_E\_T T L G\_G\_W\_L\_L\_I\_Q\_Q\_R\_M\_D\_G\_S\_V\_N\_F\_N\_R  
S W D E Y R S G F G S V D A D G R G E F W L G N Q N L H W L  
T W\_Q D Y\_R\_R\_G\_F\_G\_S\_V\_D\_G\_K\_G\_Q\_G\_E\_L\_W\_L\_G\_N\_E\_N\_I\_H\_L\_L\_  
T S Q S E T L L K V E M E D W E G G A A T A E Y T L R V G S

```

T_ Q_N D T_L_L_R V_E_L E_D_W_D G_N A_A_Y A_E_Y_I V Q V_G_T
E E E G F P L H V S G Y S G E G G D A L V L S G S D M A P S
E_A E_G_Y A L_T V_S_S Y_E G_T A G_D_A_L_V_A G W L E E G S E
L   S H D G M K F S T F D K D N D K W D Q N C A E V Y G G G
Y T S_H_A Q M_Q F_S_T_F_D_R D_Q D_H W_E E S C_A_E_V_Y_G_G_G
W W Y N R C Q S A N L N G V Y Y R G S   Y N P E K N P A
W_W_Y_N_S C_Q_A A_N_L_N_G_I Y_Y_P G_G H Y_D P_R Y N_V P Y E
V H N G V V W S T F N S S   Y S L K A
I E N_G_V_V_W_I P F_R A S_D Y_S_L_K_V V R M K I R P L E T L

```

FAPL >fugu antiplasmin on scaf1092

(sequence length=460)

HAPL >gi|178751|gb|AAA35543.1| alpha-2-antiplasmin precursor

(sequence length=488)

Number of matches = 159

Fraction of identities per length = 0.345652

```

M A L W F R R L S L L N R K \ / K P E N N S A T K V P A   A A N T
  L_W_   G L_L V L_S W S   C L Q G P C S V F S P_V \ / S A_M E
S Q P D S   S E D G R N E D   Y C L I G R S L E S R   E A I A
P L G R Q \ / L T S G_P N_Q E Q V S P L_T L L K L_G N Q \ / E_P G G
A A I Q K L G V Q L L Q N L E A T P E Q P N I I I S P L S \ / A
Q T A L K_   S P P G V C S R D P T_P_E_Q_T H R L A R A M M   A_
F T A S P L S F V   S I F P K F   M A A W R C P H A L I
F_T_A_D L F S_L V_A Q T S_T C P_N L I L S P L S V A L A_L_S
A L F L   A G A V N E T R E L L M H H L H E R A L P C Y H E S
H_L_A_L_ \ / G_A_Q N_H T_L Q R L_Q Q V L_H_A G S G P_C_L P H L
L H N I L A G L R K N D L Q I A T Q I F L R Q \ / G F Q P K Q D
L_S R L C Q D L_G P G A F R L A_A R M Y L_Q K \ / G_F_P I K_E D_
F V N K S R H L Y G S E P A E L K S   L Q Q I N D W
F_L_E_Q_S_E_Q L_F_G_A K P_V S L_T G K Q E D D L_A N I_N_Q_W_
V Y N A T N G K M P Q F L S A L P L N V L V M L I N A V H F
V_K E A_T_E G_K_I Q E F_L_S_G L_P_E D T V L L L_L_N_A_I_H_F_
K \ / G   W V A R F D P R F T S R G A F Y L D D N N M I D V E V
Q \ / G_F W_R N K F_D_P_S L_T_Q R_D S F_H L_D_E Q F T V P_V_E_M
M E D A K H P L S L F I D N E M D A Q \ / V M Q V   A R F R F R K
M_Q A R T Y P_L_R W F_L   L E Q P   E I Q_V_ \ / A_D F_P F_K N
L M S L L V V M P T S S Q V S V A S L L P K L N V S K L Y S
N M_S_F V V_L V P_T_H F E W N V_S Q V L_A N L_S W D T L_H P
R L P K E R A V Q V K V P K F K L E Y S Q E L Q E V F T K I \ /

```

P L V W E R P T K V R L P K L Y L K H Q M D L V A T L S Q L /\
  
 G G L G E I F S R P N L A E I A D G P L L V S S V M H K S T
  
 G L Q E L F Q A P D L R G I S E Q S L V V S G V Q H Q S T
  
 M E I N E E G A E A A A A T T V V I S R A S S P V F H M T Q
  
 L E L S E V G V E A A A A T S I A M S R M S L S S F S V N R
  
 P F F F A V M D D T T E V P I F M G V V N N P N P G A P
  
 P F L F F I F E D T T G L P L F V G S V R N P N P S A P R E
  
 V M Q T G D K V G F P I D K S M
  
 L K E Q Q D S P G N K D F L Q S L K G F P R G D K L F G P D
  
 T R F E G P P K
  
 L K L V P P M E E D Y P Q F G S P K

FUAT >fugu antithrombin-III scandidate on Scaffold\_1063

(sequence length=437)

HSAT >gi|113936|sp|P01008|ANT3\_HUMAN Antithrombin-III precursor (ATIII)

(sequence length=464)

Number of matches = 241

Fraction of identities per length = 0.551487

M P A S D W L L L L A S L H V V S
  
 M Y S N V I G T V T S G K R K V Y L L S L L L I G F W D C V
  
 A D V L D I C G A K P R D L A L E P R C I Y R S P D P
  
 T C H G S P V D I C T A K P R D I P M N P M C I Y R S P E K
  
 E A P E P L T T H P V P G S T N P R V W E L S K A N A R F
  
 K A T E D E G S E Q K I P E A T N R R V W E L S K A N S R F
  
 A M S L Y K Q V A S S R G P E S N I F M S P I S I S T A F A
  
 A T T F Y Q H L A D S K N D N D N I F L S P L S I S T A F A
  
 M T K L G A C N Q T L E Q L M R \/ V F E F D T I K E K T S D Q
  
 M T K L G A C N D T L Q Q L M E /\ V F K F D T I S E K T S D Q
  
 V H F F F A K L N C R L Y R K K D K S N E L V S A N R L F G
  
 I H F F F A K L N C R L Y R K A N K S S K L V S A N R L F G
  
 D K S L A F D Q T Y Q N I S E T V Y G A K L L P L D F K \/ D D
  
 D K S L T F N E T Y Q D I S E L V Y G A K L Q P L D F K /\ E N
  
 P E K A R V T I N N W I S N K T E N L I Q D T L P P G G \/ G
  
 A E Q S R A A I N K W V S N K T E G R I T D V I P S E A I N
  
 H W K N K F D K D N V Y V S E F H S S Q T R S W L
  
 E L T V L V L V N T I Y F K /\ G L W K S K F S P E N T R K E L
  
 G Q H D V P G G P A F R \/ R P F R Y K H F P E D Q V
  
 F Y K A D G E S C S A S M M Y Q E G K F R Y R R V A E G T
  
 Q L L E M P Y R G D D I T M V I I L P S Q G T A L S Q \/ V E E

Q\_V\_L\_E\_L\_P\_F\_K\_G\_D\_D\_I\_T\_M\_V\_L\_I\_L\_P\_K\_P\_E\_K\_S\_L\_A\_K\_V\_E\_K  
 V\_L\_D\_L\_K\_K\_L\_S\_A\_W\_L\_D\_Q\_M\_K\_E\_T\_T\_V\_S\_V\_H\_V\_P\_R\_F\_R\_V\_E\_D  
 E\_L\_T\_P\_E\_V\_L\_Q\_E\_W\_L\_D\_E\_L\_E\_E\_M\_M\_L\_V\_V\_H\_M\_P\_R\_F\_R\_I\_E\_D\_  
 S\_F\_S\_L\_K\_E\_K\_L\_Q\_L\_L\_G\_L\_T\_D\_L\_F\_D\_P\_N\_K\_A\_S\_L\_P\_\/\_G\_M\_L\_E\_D  
 G\_F\_S\_L\_K\_E\_Q\_L\_Q\_D\_M\_G\_L\_V\_D\_L\_F\_S\_P\_E\_K\_S\_K\_L\_P\_\/\_G\_I\_V\_A\_E  
 G\_V\_E\_G\_L\_H\_I\_S\_D\_A\_Y\_H\_K\_A\_F\_L\_E\_\/\_V\_N\_E\_E\_G\_S\_E\_A\_A\_A\_A\_T\_A  
 G\_R\_D\_D\_L\_Y\_V\_S\_D\_A\_F\_H\_K\_A\_F\_L\_E\_\/\_V\_N\_E\_E\_G\_S\_E\_A\_A\_A\_S\_T\_A  
 A\_V\_A\_T\_G\_R\_S\_I\_N\_L\_N\_R\_E\_I\_F\_Q\_A\_N\_R\_P\_F\_L\_L\_L\_I\_R\_E\_A\_S\_I  
 V\_V\_I\_A\_G\_R\_S\_L\_N\_P\_N\_R\_V\_T\_F\_K\_A\_N\_R\_P\_F\_L\_V\_F\_I\_R\_E\_V\_P\_L  
 N\_T\_L\_L\_F\_I\_A\_R\_V\_A\_E\_P\_C\_D\_R  
 N\_T\_I\_I\_F\_M\_G\_R\_V\_A\_N\_P\_C\_V\_K

FUPC >fugu protein C on scaffold 8062  
 (sequence length=448)  
 HSPC >gi|21707771|gb|AAH34377.1| human protein  
 (sequence length=461)

Number of matches = 204  
 Fraction of identities per length = 0.455357

M\_L\_R\_P\_V\_L\_C\_A\_S\_V\_A\_V\_W\_W\_S\_A\_S\_V\_L\_G\_L\_S\_\/\_V\_F\_S\_N  
 M\_W\_Q\_L\_T\_S\_L\_L\_L\_F\_V\_A\_T\_W\_G\_I\_S\_G\_T\_P\_A\_P\_L\_\/\_D\_S\_V\_F\_S\_S  
 A\_P\_D\_A\_H\_M\_L\_L\_R\_S\_R\_R\_A\_N\_S\_F\_L\_E\_E\_L\_K\_P\_P\_S\_M\_E\_R\_E\_C  
 S\_E\_R\_A\_H\_Q\_V\_L\_R\_I\_R\_K\_R\_A\_N\_S\_F\_L\_E\_E\_L\_R\_H\_S\_S\_L\_E\_R\_E\_C\_  
 V\_E\_E\_N\_C\_D\_F\_E\_E\_A\_R\_E\_I\_F\_Q\_T\_R\_E\_A\_T\_V\_R\_V\_A\_V\_N\_A\_C\_\/\_I\_L  
 I\_E\_E\_I\_C\_D\_F\_E\_E\_A\_K\_E\_I\_F\_Q\_N\_V\_D\_D\_T\_L\_A\_F\_W\_S\_K\_H\_V\_\/\_D\_G  
 G\_N\_H\_E\_L\_L\_P\_D\_G\_N\_Q\_C\_D\_N\_N\_M\_C\_V\_N\_G\_T\_C\_V\_D\_K\_Y\_Q\_A\_Y\_A  
 D\_Q\_C\_L\_V\_L\_P\_L\_E\_H\_P\_C\_A\_S\_L\_C\_C\_G\_H\_G\_T\_C\_I\_D\_G\_I\_G\_S\_F\_S  
 C\_S\_C\_N\_H\_G\_Y\_E\_G\_R\_Y\_C\_D\_Q\_\/\_P\_L\_T\_A\_T\_N\_C\_S\_L\_D\_N\_G\_N\_C\_D\_H  
 C\_D\_C\_R\_S\_G\_W\_E\_G\_R\_F\_C\_Q\_R\_\/\_E\_V\_S\_F\_L\_N\_C\_S\_L\_D\_N\_G\_G\_C\_T\_H\_  
 E\_C\_T\_D\_G\_A\_D\_G\_L\_T\_R\_R\_C\_G\_C\_V\_N\_G\_Y\_N\_L\_Q\_D\_D\_S\_R\_T\_C\_R\_P  
 Y\_C\_L\_E\_E\_V\_G\_W\_R\_R\_C\_S\_C\_A\_P\_G\_Y\_K\_L\_G\_D\_D\_L\_L\_Q\_C\_H\_P\_  
 K\_\/\_G\_P\_S\_S\_C\_G\_Q\_L\_L\_I\_G\_R\_S\_S\_Y\_T\_K\_S\_I\_D\_G  
 A\_\/\_V\_K\_F\_P\_C\_G\_R\_P\_W\_K\_R\_M\_E\_K\_K\_R\_S\_H\_L\_K\_R\_D\_T\_E\_D\_Q\_E\_D\_Q  
 L\_L\_P\_W\_M\_V\_G\_G\_E\_V\_G\_K\_K\_G\_E\_S\_P\_W\_Q\_\/\_V\_L\_V\_L\_N\_A\_V\_G\_K\_F\_H  
 V\_D\_P\_R\_L\_I\_D\_G\_K\_M\_T\_R\_R\_G\_D\_S\_P\_W\_Q\_\/\_V\_V\_L\_L\_D\_S\_K\_K\_K\_L\_A  
 C\_G\_G\_V\_L\_I\_D\_E\_S\_W\_V\_L\_T\_A\_A\_H\_C\_L\_E\_D\_S\_L\_T\_F\_R\_V\_R\_L\_G\_D  
 C\_G\_A\_V\_L\_I\_H\_P\_S\_W\_V\_L\_T\_A\_A\_H\_C\_M\_D\_E\_S\_K\_K\_L\_L\_V\_R\_L\_\/\_G\_E  
 Y\_E\_R\_L\_R\_A\_E\_G\_T\_E\_V\_T\_L\_K\_V\_T\_K\_T\_F\_K\_H\_P\_K\_Y\_N\_R\_R\_S\_V\_D  
 Y\_D\_L\_R\_R\_W\_E\_K\_W\_E\_L\_D\_L\_D\_I\_K\_E\_V\_F\_V\_H\_P\_N\_Y\_S\_K\_S\_T\_T\_D\_  
 N\_D\_I\_S\_L\_L\_R\_L\_\/\_E\_T\_P\_A\_P\_L\_S\_D\_Y\_I\_V\_P\_V\_C\_L\_P\_G\_R\_H\_L\_A\_Q



N\_D\_I\_A\_L\_L\_H\_L\_ A\_Q\_P\_A\_T\_L\_S\_Q\_T\_I\_V\_P\_I\_C\_L\_P\_D\_S\_G\_L\_A\_E  
 R\_V\_L\_N\_K\_N\_G\_T\_M\_T\_V\_V\_S\_G\_W\_G K\_E\_N\_L\_E\_S\_S\_R\_F\_S  
 R\_E\_L\_N\_Q\_A\_G\_Q\_E\_T\_L\_V\_T\_G\_W\_G\_Y\_H\_S\_S\_R\_E\_K\_E\_A\_K\_R\_N\_R\_T  
 S\_A\_L\_N\_V\_I\_K\_V\_P\_L\_V\_D\_T\_D\_T\_C\_R\_G\_Q\_M\_Y\_Y\_N\_I\_T\_S\_N\_M\_L\_C  
 F\_V\_L\_N\_F\_I\_K\_I\_P\_V\_V\_P\_H\_N\_E\_C\_S\_E\_V\_M\_S\_N\_M\_V\_S\_E\_N\_M\_L\_C\_  
 A\_G\_I\_V\_G\_Q\_K\_M\_D\_A\_C\_E\_G\_D\_S\_G\_G\_P\_M\_V\_T\_L\_Y\_R\_D\_T\_W\_F\_L\_V  
 A\_G\_I\_L\_G\_D\_R\_Q\_D\_A\_C\_E\_G\_D\_S\_G\_G\_P\_M\_V\_A\_S\_F\_H\_G\_T\_W\_F\_L\_V\_  
 G\_L\_V\_S\_W\_G\_E\_G\_C\_G\_N\_V\_E\_K\_L\_G\_I\_Y\_T\_K\_V\_S\_N\_Y\_I\_D\_W\_I\_N\_K  
 G\_L\_V\_S\_W\_G\_E\_G\_C\_G\_L\_L\_H\_N\_Y\_G\_V\_Y\_T\_K\_V\_S\_R\_Y\_L\_D\_W\_I\_H\_G  
 V\_R\_E\_D\_W\_D\_T\_S\_P\_V\_E\_R\_Q\_R\_P  
 H\_I\_R\_D\_K\_E\_A\_P\_Q\_K\_S\_W\_A\_P

PSFU >fugu protein S on Scaffold\_2356 646\_aa  
 (sequence length=646)

PSHU >gi|190442|gb|AAA60180.1| protein S alpha [Homo sapiens]  
 (sequence length=650)

Number of matches = 331

Fraction of identities per length = 0.512384

L\_S\_P\_S\_T\_A\_S\_Q\_F\_L\_R\_R\_H\_R\_R\_A\_N\_S\_L\_F\_E\_E\_S\_K\_P\_G\_N\_L\_E\_R  
 L\_S\_K\_Q\_Q\_A\_S\_Q\_V\_L\_V\_R\_K\_R\_R\_A\_N\_S\_L\_L\_E\_E\_T\_K\_Q\_G\_N\_L\_E\_R\_  
 E\_C\_I\_E\_E\_L\_C\_N\_K\_E\_E\_A\_R\_E\_I\_F\_E\_N\_Q\_P\_E\_T\_\/\_E\_Y\_F\_Y\_P\_K\_Y\_V  
 E\_C\_I\_E\_E\_L\_C\_N\_K\_E\_E\_A\_R\_E\_V\_F\_E\_N\_D\_P\_E\_T\_\/\_D\_Y\_F\_Y\_P\_K\_Y\_L  
 \/\_V\_C\_L\_G\_S\_H\_R\_V\_G\_I G\_N\_Q\_H\_P\_G\_I\_P\_S\_D\_L\_R\_T\_C\_V\_T\_\/\_E  
 V\_C\_L\_R\_S\_F\_Q\_T\_G\_L\_F\_T\_A\_A\_R\_Q\_S\_T\_N\_A\_Y\_P\_D\_L\_R\_S\_C\_V\_N\_\/\_A  
 I\_N\_N\_Q\_C\_S\_P\_Y\_P\_C\_Y\_K\_E\_G\_S\_L\_R\_C\_V\_D\_G\_Q\_A\_S\_F\_T\_C\_V\_C\_K  
 I\_P\_D\_Q\_C\_S\_P\_L\_P\_C\_N\_E\_D\_G\_Y\_M\_S\_C\_K\_D\_G\_K\_A\_S\_F\_T\_C\_T\_C\_K\_  
 P\_G\_W\_K\_G\_Q\_R\_C\_E\_D\_\/\_D\_I\_D\_E\_C\_L\_D\_P E\_F\_P\_A\_G\_C\_N\_Q\_K\_C\_N  
 P\_G\_W\_Q\_G\_E\_K\_C\_E\_F\_\/\_D\_I\_N\_E\_C\_K\_D\_P\_S\_N\_I\_N\_G\_G\_C\_S\_Q\_I\_C\_D  
 N\_I\_P\_G\_S\_F\_Q\_C\_Q\_C\_E\_S\_G\_H\_Y\_F\_L N\_Q\_I\_T\_C\_V\_\/\_D\_V\_D\_E\_C\_Q  
 N\_T\_P\_G\_S\_Y\_H\_C\_S\_C\_K\_N\_G\_F\_V\_M\_L\_S\_N\_K\_K\_D\_C\_K\_\/\_D\_V\_D\_E\_C\_S  
 L\_Y\_P\_S\_I\_C\_K\_E\_P\_A\_R\_C\_V\_N\_S\_P\_G\_M\_Y\_E\_C\_R\_C\_P\_K\_G\_F\_R\_Y\_N  
 L\_K\_P\_S\_I\_C\_ G\_T\_A\_V\_C\_K\_N\_I\_P\_G\_D\_F\_E\_C\_E\_C\_P\_E\_G\_Y\_R\_Y\_N\_  
 F\_T\_S\_K\_T\_C\_S\_\/\_D\_V\_D\_E\_C\_E\_M\_S\_V\_C\_D\_G\_I\_C\_I\_N\_T\_V\_G\_S\_Y\_E\_C  
 L\_K\_S\_K\_S\_C\_E\_\/\_D\_I\_D\_E\_C\_S\_E\_N\_M\_C\_A\_Q\_L\_C\_V\_N\_Y\_P\_G\_G\_Y\_T\_C\_  
 H\_C\_D\_G\_R\_L\_G\_L\_R\_L\_A\_E\_N\_S\_R\_Y\_C\_Q R\_I\_P\_V\_C\_V\_D\_L\_Y\_D\_H\_K  
 Y\_C\_D\_G\_K\_K\_G\_F\_K\_L\_A\_Q\_D\_Q\_K\_S\_C\_E\_\/\_V\_V\_S\_V\_C\_L\_P\_L\_N\_L\_D\_T  
 H\_S\_E\_M\_L\_Y\_L\_G\_E\_Q\_F\_S\_G\_L\_P\_A\_M\_F\_L\_R\_Y\_R\_L\_P\_E\_N\_T\_K\_\/\_F\_A  
 K\_Y\_E\_L\_L\_Y\_L\_A\_E\_Q\_F\_A\_G\_V V\_L\_Y\_L\_K\_F\_R\_L\_P\_E\_I\_S\_R\_\/\_F\_S  
 A\_E\_F\_D\_F\_R\_T\_F\_D\_P\_E\_G\_V\_V\_L\_Y\_A\_E\_S S\_Q\_G\_S\_W\_F\_M\_L\_G\_L

A\_E\_F\_D\_F\_R\_T\_Y\_D\_S\_E\_G\_V\_I\_L\_Y\_A\_E\_S\_I\_D\_H\_S\_A\_W\_L\_L\_I\_A\_L\_  
 R\_G\_G\_H\_I\_E\_V\_Q\_F\_K\_N\_Q\_H\_T\_F\_K\_L\_T\_S\_G\_G\_K\_A\_I\_N\_D\_G  
 R\_G\_G\_K\_I\_E\_V\_Q\_L\_K\_N\_E\_H\_T\_S\_K\_I\_T\_T\_G\_G\_D\_V\_I\_N\_N\_G\_L\_W\_N  
 T \ / I\_S\_V\_D\_E\_L\_E\_S\_S\_I\_S\_V\_K\_I\_S\_K\_E\_A\_V\_M\_S\_I\_N\_S\_P\_Q\_S\_L\_F  
 M \ / V\_S\_V\_E\_E\_L\_E\_H\_S\_I\_S\_I\_K\_I\_A\_K\_E\_A\_V\_M\_D\_I\_N\_K\_P\_G\_P\_L\_F\_  
 T\_A\_V\_N\_G\_K\_V\_E\_T\_K\_V\_Y\_I\_A\_G\_L\_P\_E\_R\_A\_D\_T I\_K\_P \ / I\_N\_P  
 K\_P\_E\_N\_G\_L\_L\_E\_T\_K\_V\_Y\_F\_A\_G\_F\_P\_R\_K\_V\_E\_S\_E\_L\_I\_K\_P \ / I\_N\_P\_  
 R\_L\_D\_G\_C\_I\_R\_G\_W\_N\_L\_M\_N\_Q\_G\_A\_S\_R\_V\_K\_E\_V\_I\_Q\_E\_L\_K\_S\_K\_Q  
 R\_L\_D\_G\_C\_I\_R\_S\_W\_N\_L\_M\_K\_Q\_G\_A\_S\_G\_I\_K\_E\_I\_I\_Q\_E\_K\_Q\_N\_K\_H  
 C\_F\_I\_S\_V\_E\_K\_G\_S\_F\_F\_S\_G\_M\_G\_L\_A\_S\_F\_N\_V\_D\_Y \ / S\_D S\_G  
 C\_L\_V\_T\_V\_E\_K\_G\_S\_Y\_Y\_P\_G\_S\_G\_I\_A\_Q\_F\_H\_I\_D\_Y \ / N\_N\_V\_S\_S\_A\_E  
 S\_W\_S\_V\_D\_I\_E\_M\_N\_I\_R\_P\_S\_S\_S\_T\_G\_V\_I\_F\_A\_L\_V\_S N\_D\_T\_V\_P  
 G\_W\_H\_V\_N\_V\_T\_L\_N\_I\_R\_P\_S\_T\_G\_T\_G\_V\_M\_L\_A\_L\_V\_S\_G\_N\_N\_T\_V\_P\_  
 L\_S\_I\_A\_V\_V T\_Q\_G\_E\_G\_E\_A \ / N\_L\_Q\_V\_F\_L\_G\_G\_V\_S\_V\_A\_T\_L\_D\_S  
 F\_A\_V\_S\_L\_V\_D\_S\_T\_S\_E\_K\_S\_Q \ / D\_I\_L\_L\_S\_V\_E\_N\_T\_V\_I\_Y\_R\_I\_Q\_A  
 L\_M\_L\_C\_Y\_P\_E\_R\_L\_T\_V\_S\_L\_K\_I\_T\_P\_A\_A\_V\_Q\_V\_S\_G\_N\_S\_S\_T\_V\_T  
 L\_S\_L\_C\_S\_D\_Q\_Q\_S\_H\_L\_E\_F\_R\_V\_N\_R\_N\_N\_L\_E\_L\_S\_ T\_P\_L\_K\_I\_E  
 Y\_V\_T\_S\_E\_S\_L\_Q\_E\_A\_L\_E\_H\_L\_N\_A\_T\_M\_Q\_N\_P\_L\_T\_T\_Y\_I\_G\_G\_I\_P  
 T\_I\_S\_H\_E\_D\_L\_Q\_R\_Q\_L\_A\_V\_L\_D\_K\_A\_M\_K\_A\_K\_V\_A\_T\_Y\_L\_G\_G\_L\_P\_  
 \ / D\_D\_I\_P\_L\_P\_A\_T\_P\_V\_T\_A\_Y\_Y\_H\_G\_C\_M\_D\_I\_S\_V\_N\_G\_Q\_Q\_L\_D\_F\_D  
 \ / D\_V\_P\_F\_S\_A\_T\_P\_V\_N\_A\_F\_Y\_N\_G\_C\_M\_E\_V\_N\_I\_N\_G\_V\_Q\_L\_D\_L\_D\_  
 E\_A\_L\_S\_K\_H\_N\_S\_I\_K\_S\_H\_S\_C\_P\_P\_V\_S\_A\_P\_D\_R\_Q\_G\_D\_V\_L\_Q\_P\_P  
 E\_A\_I\_S\_K\_H\_N\_D\_I\_R\_A\_H\_S\_C\_P\_S\_V\_W\_K\_K\_T\_K\_N\_S  
 A E

FUPT >fugu prothrombin on scaffold 403  
 (sequence length=618)  
 HSPT >gi|339641|gb|AAC63054.1| prothrombin [Homo sapiens  
 (sequence length=622)

Number of matches = 323  
 Fraction of identities per length = 0.522654

M\_A\_G\_P\_T\_V\_K\_P\_L\_T\_V\_L\_L\_L\_F\_L\_L\_H\_S\_C\_L A\_N\_H \ / V\_F\_L\_S  
 M\_A\_H\_V\_R\_G\_L\_Q\_L\_P\_G\_C\_L\_A\_L\_A\_A\_L\_C\_S\_L\_V\_H\_S\_Q\_H \ / V\_F\_L\_A  
 S\_R\_S\_A\_S\_Q\_V\_L\_V\_R\_S\_R\_R\_A\_N\_Q\_M\_F\_E\_E\_I\_K\_A \ / G\_N\_L\_E\_R\_E\_C  
 P\_Q\_Q\_A\_R\_S\_L\_L\_Q\_R\_V\_R\_R\_A\_N\_T\_F\_L\_E\_E\_V\_R\_K G\_N\_L\_E\_R\_E\_C\_  
 M\_E\_E\_K\_C\_N\_Q\_E\_E\_A\_R\_E\_V\_F\_E\_Q\_P\_D\_T\_T \ / E\_A\_F\_W\_K\_K\_Y\_L \ / D\_C  
 V\_E\_E\_T\_C\_S\_Y\_E\_E\_A\_F\_E\_A\_L\_E\_S\_S\_T\_A\_T \ / D\_V\_F\_W\_A\_K\_Y\_T A\_C\_  
 N\_G N\_Q\_L\_P\_R\_T\_E\_A\_N\_I\_I\_A\_F\_K\_E\_C\_L\_D \ / G\_F\_C\_I\_S\_G\_R\_G\_L\_N  
 E\_T \ / A\_R\_T\_P\_R\_D\_K L\_A\_A\_C\_L\_E \ / G\_N\_C\_A\_E\_G\_L\_G\_T\_N\_

Y A G N V N I S K S G I Q C Q H W K H S F P H P I M R \ / E Y N  
Y\_R\_G\_H\_V\_N\_I\_T\_R\_S\_G\_I\_E\_C\_Q\_L\_W\_R\_S\_R\_Y\_P\_H\_K\_P\_E\_I /\ N S

A S E P D S I L Q E N F C R N P N N S P D G P W C F T T D P  
T T H P\_G\_A\_D\_L\_Q\_E\_N\_F\_C\_R\_N\_P\_D\_S\_S\_T\_T\_G\_P\_W\_C\_Y\_T\_T\_D\_P

T V Q K E T C R V P I C G \ / V F L I P G E A F V P P T P T P K  
T\_V\_R\_R\_Q\_E\_C\_S\_I\_P\_V\_C\_G /\ Q D Q V T V A M T P R S E G S S V

H F K T I Q S S C I S N Y G V D Y V G D L D V S A K G H A C  
N L S P P L E Q C\_V\_P\_D\_R\_G\_Q\_Q\_Y\_Q\_G\_R\_L\_A\_V\_T\_T\_H\_G\_L\_P\_C

L M W S S P E A V T L S Q N K E F D P D I N L L C N K C R N  
L\_A\_W\_A\_S\_A\_Q\_A\_K\_A\_L\_S\_K\_H\_Q\_D\_F\_N\_S\_A\_V\_Q\_L\_V\_E\_N\_F\_C\_R\_N

P D K D P E G P W C Y V N A S G K V I V D Y C D L P V C \ / E D  
P\_D\_G\_D\_E\_E\_G\_V\_W\_C\_Y\_V\_A\_G\_K\_P\_G\_D\_F G\_Y\_C\_D\_L\_N\_Y\_C /\ E\_E

L L S Q E E T L D T G A Q Q R T T L S S S K K R F  
A\_V\_E\_E\_E\_T\_G\_D\_G\_L\_D\_E\_D\_S\_D\_R\_A\_I\_E\_G\_R\_T\_A\_T\_S\_E\_Y\_Q\_T\_F

F N P R T F G E G E D \ / E C G R R P L F E Q K N K K D A S E D  
F\_N\_P\_R\_T\_F\_G\_S\_G\_E\_A /\ D\_C\_G\_L\_R\_P\_L\_F\_E\_K\_K\_S\_L\_E\_D\_K\_T\_E\_R

E L L Q S Y R E K R I V G G D E A E V A S A P W \ / Q V M L Y K  
E\_L\_L\_E\_S\_Y\_I\_D\_G\_R\_I\_V\_E\_G\_S\_D\_A\_E\_I\_G\_M\_S\_P\_W /\ Q\_V\_M\_L\_F\_R

R S P Q E L L C G A S L I S N E W V L T A A H C I L Y P P W  
K\_S\_P\_Q\_E\_L\_L\_C\_G\_A\_S\_L\_I\_S\_D\_R\_W\_V\_L\_T\_A\_A\_H\_C\_L\_L\_Y\_P\_P\_W

N K N F S A S D I L V R L G K H N R A K \ / F E Q G I E K I M V  
D\_K\_N\_F\_T\_E\_N\_D\_L\_L\_V\_R\_I\_G\_K\_H\_S\_R\_T\_R /\ Y\_E\_R\_N\_I\_E\_K\_I\_S\_M

V D L I I V H P K Y N W K E N L N R D I A L L H L R R P I P  
L\_E\_K\_I\_Y\_I\_H\_P\_R\_Y\_N\_W\_R\_E\_N\_L\_D\_R\_D\_I\_A\_L\_M\_K\_L\_K\_K\_P\_V\_A

F S N V I H P I C L P N K K V A R M \ / L M T T G F K G R V T G  
F\_S\_D\_Y\_I\_H\_P\_V\_C\_L\_P\_D\_R\_E\_T\_A\_A\_S /\ L\_L\_Q\_A\_G\_Y\_K\_G\_R\_V\_T\_G

W G N L K E S F D P A A R N L P T K L Q Q I H L P I V E E  
W\_G\_N\_L\_K\_E\_T\_W\_T\_A\_N\_V\_G\_K\_G\_Q\_P\_S\_V\_L\_Q\_V\_V\_N\_L\_P\_I\_V\_E\_R

D V C R S S T S I R I T D N M F C A \ / G Y K P E D N K R G D A  
P\_V\_C\_K\_D\_S\_T\_R\_I\_R\_I\_T\_D\_N\_M\_F\_C\_A /\ G\_Y\_K\_P\_D\_E\_G\_K\_R\_G\_D\_A

C E G D S G G P F V M K H P E E N R W Y Q M G I V S W G E G  
C\_E\_G\_D\_S\_G\_G\_P\_F\_V\_M\_K\_S\_P\_F\_N\_N\_R\_W\_Y\_Q\_M\_G\_I\_V\_S\_W\_G\_E\_G

C D R D G K Y G F Y T H V F R M T K W M R K V I E Q  
C\_D\_R\_D\_G\_K\_Y\_G\_F\_Y\_T\_H\_V\_F\_R\_L\_K\_K\_W\_I\_Q\_K\_V\_I\_D\_Q\_F\_G\_E

TAFI >Fugu thrombin-activatable fibrinolysis inhibitor on scafl23  
(sequence length=421)

TAFI >gi|4503005|thrombin-activatable fibrinolysis inhibitor(TAFI)  
(sequence length=423)

Number of matches = 216  
Fraction of identities per length = 0.513064

```
          M S Y I F L F C          L I   S D Q V L S  
M K L C S L A V L V P I_V L_F_C_E Q H V F A F Q /\ S_G Q_V_L_A  
  
I T P K T Q E H V D I L K N V S T Q Y E \/ T S L W Q P D S P Q  
A L P_R T_S R Q V_Q V L_Q N_L T T_T Y_E /\ I V L_W_Q_P_V T A D  
  
Y I Q E E M E V H L Y V P A R T L K T V K D L L N K H T I \/ V  
L I_V K K K Q V_H_F F V_N_A_S D V D N V_K_A H L_N_V S G I_ P  
  
C   F R V L L A N A K E L I E M Q T K N E T T D P R S S A S Y  
C_/\   S V_L_L_A D V E D L_I_Q Q Q_I S N_D T_V S P_R A S A_S_Y  
  
Y E K Y H S L N D \/ I Y F W I N Q T Q Q D N P N I V K V I L I  
Y_E_Q Y_H_S_L_N_E /\ I_Y_S_W_I_E F I T E R H P_D M L T K I_H I  
  
G S S S E K R P L Y V L K \/ L S R N K G P E K K A M W I D C G  
G_S_S_F_E_K_Y_P_L_Y_V_L_K /\ V_S_G_K_E_Q T A K_N_A_I_W_I_D_C_G  
  
I H A R E W I S P A F C L W F V R H \/ S L S F Y G Q N Q D I T  
I_H_A_R_E_W_I_S_P_A_F_C_L_W_F_I_G_H /\ I T Q F_Y_G_I I G Q Y T  
  
H I L D N L D V Y I L P V M N P D G Y E Y T W T T \/ Q N R M W  
N L L_R L V D_F Y_V M P_V_V N_V D_G_Y_D Y_S W_ K /\ K N_R_M_W  
  
R K N R S V S K S D N C I G A D L N R N F D A   N W C \/ T E G  
R_K_N_R_S_F_Y_A_N N H C_I_G_T D_L_N_R_N_F_A S K H W_C /\ E E_G  
  
A S D D P C S E I Y C G A F P E S E P E S Q S V A H F L R S  
A_S_S S S C_S_E_T Y_C_G_L Y_P_E_S_E_P_E_V K A V_A_S_F_L_R_R  
  
H K D S V K L Y F S I H S Y S Q M L L F P Y S C T L D E A E  
N I N Q I K_A_Y_I S_M H_S_Y_S_Q_H I V F_P_Y_S_Y T_R S K S K  
  
N H N E L V S \/ L D M A Q E A A Q K I R R Y Y R N T   Y K Y G  
D_H_E_E_L_ S_/\ L_ V_A_S_E_A_V R A I_E K T S K N_T_R Y_T H G  
  
A G G K T I \/ Y L A P G G S D D W V Y N L G I K Y S F T F E L  
H_G_S_E_T_L /\ Y_L_A_P_G_G_G D_D_W_I Y_D L_G_I_K_Y_S_F_T_I_E_L  
  
Q D R G R Y G F L L P P S H I T Q A C N E A L T A L K T I A  
R_D_T_G_T Y_G_F_L_L_P_E R Y I_K P T C_R_E_A_F A A_V S K I_A  
  
R K V I E K M E A S T S S P P T V  
W H V_I_R N V
```

FB EF >fugu fibrinogen beta homolog no signal  
(sequence length=467)  
BEHU (31->491=461)>FIBB\_HUMAN1 gi|39949  
(sequence length=461)

Number of matches = 262  
Fraction of identities per length = 0.568330

G D D L E Y D D Y E V S \ / A T V D A R G H R P L Q R G R E P Y  
Q G V N D N E E / \ G F F S A \_ R \_ G \_ H \_ R \_ P \_ L \_ D K K R \_ E \_ E A  
  
S P T R Y A P P T V T S G N R \ / Y G G R P G T A R V T Q G Q V  
P S L R \_ P \_ A \_ P \_ P \_ I S G G \_ G Y \_ R \_ A \_ R \_ P \_ A \_ K \_ A \_ A \_ T \_ Q \_ K \_ K \_ V \_  
  
Q E K Q E Q P E A G G C T H A S E E L \ / G V L C P N G C E L K  
E R K \_ A P \_ D \_ A \_ G \_ G \_ C \_ L \_ H \_ A \_ D \_ P \_ D \_ L \_ / \ G \_ V \_ L \_ C \_ P \_ T \_ G \_ C \_ Q \_ L \_ Q \_  
  
T A L L K Q E R T V R T \ / S L G E L K P Q V D E L M R S S N Q  
E A \_ L \_ L \_ Q \_ Q \_ E \_ R \_ P \_ I \_ R \_ N S \_ V \_ D \_ E \_ L \_ N \_ N \_ N \_ V \_ E \_ A \_ V \_ S \_ Q \_ T \_ S \_ S \_ S  
  
I Y N Y V S S V S V S L R E R Q R V I D \ / A N N A V V S V Y T  
S F Q Y \_ M \_ Y \_ L \_ L \_ K \_ D \_ L \_ W \_ Q \_ K \_ R \_ Q \_ K \_ Q \_ V \_ K / \ D N \_ E N V \_ V \_ N \_ E \_ Y \_ S  
  
E N V E E Q H A Y I K E T V D T I F P S N I R I L Q \ / G V L D  
S E L E \_ K \_ H \_ Q \_ L \_ Y \_ I \_ D \_ E \_ T \_ V \_ N \_ S \_ N \_ I \_ P \_ T \_ N \_ L \_ R \_ V \_ L \_ R S I L E  
  
R V R Q K I Q K L E K A I Q A Q R E D C K E P C K T K C P I  
N L R \_ S \_ K \_ I \_ Q \_ K \_ L \_ E \_ S \_ D \_ V \_ S \_ A \_ Q \_ M \_ E \_ Y \_ C \_ R \_ T \_ P \_ C \_ T \_ V \_ S \_ C \_ N \_ I \_  
  
P V V S \ / G K E C E D I F R R G G R D S Q M Y M V Q P D S S V  
P \_ V \_ V \_ S \_ / \ G \_ K \_ E \_ C \_ E \_ E \_ I \_ I \_ R \_ K \_ G \_ G \_ E \_ T \_ S \_ E \_ M \_ Y \_ L \_ I \_ Q \_ P \_ D \_ S \_ S \_ V \_  
  
H P Y R V F C D Q T T Q K G \ / G W L L I Q N R L D G S V D F G  
K \_ P \_ Y \_ R \_ V \_ Y \_ C \_ D \_ M \_ N \_ T \_ E \_ N \_ G / \ G \_ W \_ T \_ V \_ I \_ Q \_ N \_ R \_ Q \_ D \_ G \_ S \_ V \_ D \_ F \_ G \_  
  
R R W D D Y R R G F G N I A F D A G K G H C E T P \ / G E Y W  
R \_ K \_ W \_ D \_ P \_ Y \_ K \_ Q \_ G \_ F \_ G \_ N \_ V \_ A \_ T \_ N \_ T \_ D \_ G \_ K \_ N \_ Y \_ C \_ G \_ L \_ P \_ / \ G \_ E \_ Y \_ W \_  
  
L G N D R I S Q L T K M G P T E V L I E M Q D W T G A K \ / V H  
L \_ G \_ N \_ D \_ K \_ I \_ S \_ Q \_ L \_ T \_ R \_ M \_ G \_ P \_ T \_ E \_ L \_ L \_ I \_ E \_ M \_ E \_ D \_ W \_ K \_ G \_ D \_ K \_ V \_ K  
  
A Q Y R Q F T V Q S D T S N Y V L S V D G Y S G N A G N S F  
A \_ H \_ Y \_ G \_ G \_ F \_ T \_ V \_ Q \_ N \_ E \_ A \_ N \_ K \_ Y \_ Q \_ I \_ S \_ V \_ N \_ K \_ Y \_ R \_ G \_ T \_ A \_ G \_ N \_ A \_ L  
  
M E G A L E L F G V N R T M T I H N A M R F S T Y D R D N D  
M \_ D \_ G \_ A \_ S \_ Q \_ L \_ M \_ G \_ E \_ N \_ R \_ T \_ M \_ T \_ I \_ H \_ N \_ G \_ M \_ F \_ F \_ S \_ T \_ Y \_ D \_ R \_ D \_ N \_ D \_  
  
N W \ / S P G D P S K Q C S R E D G G G W W Y N R C H S S N P N  
G \_ W \_ L \_ T \_ S \_ D \_ P \_ R \_ K \_ Q \_ C \_ S \_ K \_ E \_ D \_ G \_ G \_ G \_ W \_ W \_ Y \_ N \_ R \_ C \_ H \_ A \_ A \_ N \_ P \_ N \_  
  
G R Y Y M G G A Y T R Y M A K H G T D D G V V W M N W K G S  
G \_ R \_ Y \_ Y \_ W \_ G \_ G \_ Q \_ Y \_ T \_ W \_ D \_ M \_ A \_ K \_ H \_ G \_ T \_ D \_ D \_ G \_ V \_ V \_ W \_ M \_ N \_ W \_ K \_ G \_ S \_  
  
W Y S L K T I S M K I R P F F A S K  
W \_ Y \_ S \_ M \_ R \_ K \_ M \_ S \_ M \_ K \_ I \_ R \_ P \_ F \_ F \_ P \_ Q \_ Q

FUFX >fugu f10 on scaf2859  
(sequence length=467)

HSFX >gi|20336663|gb|AAM19347.1|AF503510\_1 coagulation factor X [Homo sapiens  
(sequence length=488)

Number of matches = 207  
Fraction of identities per length = 0.443255

M F R L F F I A F L D K T G  
M\_G\_R\_P\_L\_H\_L\_V\_L\_L\_S\_A\_S\_L\_A\_G\_L\_L\_L\_L\_G\_E\_S\_L\_F\_I\_R\_R /\ E\_Q  
  
A S Q L L S R Q R R A N S L F E E V K Q G N M E R E C N E E  
A\_N\_N\_I\_L\_A\_R\_V\_T\_R\_A\_N\_S\_F\_L\_E\_E\_M\_K\_K\_G\_H\_L\_E\_R\_E\_C\_M\_E\_E\_  
  
H C S K E E A R E I F E D D D K T \/ D G D A C  
T\_C\_S\_Y\_E\_E\_A\_R\_E\_V\_F\_E\_D\_S\_D\_K\_T\_/\ N E F W N K Y K D\_G\_D\_Q\_C\_  
  
K S T P C V N K G R C K D G I G S Y T C F C L S G Y Q G F N  
E T S\_P\_C\_Q\_N\_Q\_G\_K\_C\_K\_D\_G\_L\_G\_E\_Y\_T\_C\_T\_C\_L\_E\_G\_F\_E\_G\_K\_N\_  
  
C E I \/ V I P Q L C E N E N G G C E H F C K V V R G N V R C S  
C\_E\_L /\ F T R K L\_C\_S\_L\_D\_N\_G\_D\_C\_D\_Q\_F\_C\_H\_E\_E\_Q\_N\_S\_V\_V\_C\_S\_  
  
C A D G Y E L G P D D K S C Q S N \/ E T F R C G G I I T E N V  
C\_A\_R\_G\_Y\_T\_L\_A\_D\_N\_G\_K\_A\_C\_I\_P\_T /\ G P Y P C\_G\_K\_Q\_T\_L\_E\_R\_R  
  
R T I L R Y R P N T N T N G T K S D N S S S T N S T E Q E D  
K R S V A Q A T S S S G E A P D S\_I T W K P Y D A A D L D P  
  
E E F S S G T S Q R K A H A A S D H E M S T M T R I V N G E  
T\_E\_N\_P\_F\_D\_L\_L\_D\_F\_N Q T Q P E R G D N N L T\_R\_I\_V\_G\_G\_Q  
  
D C P P G E C P W Q \/ A V L L N E E H H W F C G G T I L N P Y  
E\_C\_K\_D\_G\_E\_C\_P\_W\_Q /\ A\_L\_L\_I\_N\_E\_E\_N\_E\_G\_F\_C\_G\_G\_T\_I\_L\_S\_E\_F  
  
I I L T A A H C M N E T R Y F Y I R L \/ G E S D M L E N E G T  
Y\_I\_L\_T\_A\_A\_H\_C\_L\_Y\_Q\_A\_K\_R\_F\_K\_V\_R\_V G\_D\_R\_N\_T\_E\_Q\_E\_E\_G\_G  
  
E A M Y E V E T I L A H Y N Y K P N T Y H N D I A L I K L T  
E\_A\_V\_H\_E\_V\_E\_V\_V\_I\_K\_H\_N\_R\_F\_T\_K\_E\_T\_Y\_D\_F\_D\_I\_A\_V\_L\_R\_L\_K  
  
K P I K Y S R F I L P A C I P E Q E F A E S \/ V L M Q Q S D G  
T\_P\_I\_T\_F\_R\_M\_N\_V\_A\_P\_A\_C\_L\_P\_E\_R\_D\_W\_A\_E\_S\_ T\_L\_M\_T\_Q\_K\_T\_G\_  
  
M I S G F G R L G G N R Q T S P I L K R L T I P Y V E R R T  
I\_V\_S\_G\_F\_G\_R\_T\_H\_E\_K\_G\_R\_Q\_S\_T\_R\_L\_K\_M\_L\_E\_V\_P\_Y\_V\_D\_R\_N\_S  
  
C M E S T S L R I S A R M F C A G Y D E I A K D A C Q G D S  
C\_K\_L\_S\_S\_S\_F\_I\_I\_T\_Q\_N\_M\_F\_C\_A\_G\_Y\_D\_T\_K\_Q\_E\_D\_A\_C\_Q\_G\_D\_S\_  
  
G G P H V T R Y R S T Y F I T G I V S W G E G C A Q K G K Y  
G\_G\_P\_H\_V\_T\_R\_F\_K\_D\_T\_Y\_F\_V\_T\_G\_I\_V\_S\_W\_G\_E\_G\_C\_A\_R\_K\_G\_K\_Y\_  
  
G V Y T Q V S K Y I R W I R D G I N T L I P K G Q S T R L  
G\_I\_Y\_T\_K\_V\_T\_A\_F\_L\_K\_W\_I\_D\_R\_S\_M\_K\_T\_R\_G\_L\_P\_K\_A\_K\_S\_H\_A\_P  
  
K R H Y G P I R R I V G  
E V I T S S P L K

13A1 >fugu f13 on Scaffold\_3692  
(sequence length=742)

H13A >gi|20379735| coagulation factor XIII [Homo sapien]  
(sequence length=732)

Number of matches = 344

Fraction of identities per length = 0.469945

M S D P A P V V D P S P A P A A P S G P R P K V T N R G R T  
M\_S\_E T S R T A F G G\_R\_R

A V A V A S S N S E S T E V P E F E S F V A L S P R G F P P  
A\_V\_P P N N S\_N\_A A E D D L P\_T V E\_ L Q G V V P\_R\_G\_ V N

L T D Y \\/ L D I V A V D M M S Q S D G V N K Q Q H R T M F Y N  
L\_Q\_E F /\ L\_N V T S\_V\_H L F K E R W D T N\_K\_V D H\_H T\_D K\_Y\_E

S N Y L I V R R G Q E F H V K L T F N R P Y N P K E D K F A  
N\_N\_K L\_I\_V\_R\_R\_G\_Q\_S F\_Y V\_Q I D F\_S R\_P\_Y\_D P\_R R D\_L F\_R

L E F V I G \\/ A N P D Y S K G T Y I P V F P N K E R Q S R W  
V\_E\_Y V\_I\_G\_/\ R Y P\_Q E N K\_G\_T\_Y\_I\_P\_V\_P I V S E L Q S G K W\_

A G R I A D S S N N D V T V G I T P L A N C I V G K Y H M Y  
G A K I\_V M R E D R S V\_R L S I\_Q S S P K C\_I\_V\_G\_K\_F R M\_Y\_

I A V M T P F G I R R T R K D P V R D L Y I L F N P W \\/ S P A  
V\_A\_V\_W T\_P\_Y\_G\_V L R\_T\_S R N P\_E T D\_T Y\_I\_L\_F\_N\_P\_W\_ C E /\ D

D D V F L D D E P E R Q E C V M N E M G I I Y H G A Y D D I  
D\_A\_V\_Y L\_D\_N E\_K E\_R\_E E\_Y V\_L N\_D I G\_V I\_F Y G\_E V N\_D\_I\_

A E R Q W N Y G Q \\/ F N Y G V L D A C L Y I M D R S E M P I T  
K T R\_S W\_S Y\_G\_Q\_/\ F\_E D G\_I L\_D\_T C\_L\_Y\_V M\_D\_R\_A Q M\_D L S

N R G D P I K V T R K A S A M \\/L N S R D D D G V L V G N W S  
G\_R\_G\_N P\_I\_K\_V\_S R\_V G\_S\_A\_M\_ V /\ N\_A K D\_D\_E G\_V\_L V\_G\_S W\_D

G D Y T Y G V A P T S W T G S T E I L L T Y A S S R M P V S  
N I\_Y\_A\_Y\_G\_V\_P P\_S A W\_T\_G\_S\_V D I\_L\_L\_E Y\_R\_S\_S\_E N P\_V\_R

Y A Q C W V Y A A V F N T \\/ F L R C L G I P S R V V T N Y Y S  
Y\_G\_Q\_C\_W\_V\_F\_A\_G V\_F\_N\_T\_/\ F\_L\_R\_C\_L\_G\_I\_P\_A\_R\_I\_V\_T\_N\_Y\_F\_S\_

A H D N D G N L K T D I I L D E N G K I D R S R T R D S I W \\/  
A\_H\_D\_N\_D\_A\_N\_L\_Q M D\_I\_F L\_E\_E\_D G\_N V N S K L T\_K D\_S\_V W\_/\

N Y H C W N E C Y M T R P D L P F G F G G W Q V V D A T P Q  
N\_Y\_H\_C\_W\_N\_E\_A W M\_T\_R\_P\_D\_L\_P\_V G\_F\_G\_G\_W\_Q\_A V\_D\_S T\_P\_Q\_

E T S D \\/ G M Y R C G P A S V Q A I K H G E M C Y P F D A A F  
E\_N\_S\_D\_/\ G\_M\_Y\_R\_C\_G\_P\_A\_S\_V\_Q\_A\_I\_K\_H\_G\_H V C\_F Q F\_D\_A\_P F\_

V F A E \\/ V N S D V V F Y S R G K D G A M Q P V R V N Q T H V  
V\_F\_A\_E\_/\ V\_N\_S\_D\_L I Y I T A K K\_D\_G\_T H V V E N V\_D A T\_H\_I

G R M V L T K A P G A T T R R D I T S Q Y K F P E G \\/ T S E E  
G\_K\_L I V T\_K\_Q I G\_G D G M M D\_I\_T\_D T Y\_K\_F\_Q\_E\_G\_/\ Q E E\_E\_

R T V L E K A E G F G C H R E K S R P P E A D V D L  
R\_L\_A\_L\_E\_T\_A\_L\_M Y\_G\_A K K P L N T E\_G V M K S R S N V\_D\_M

V L P T L E V P V G Q D F E L S L E F V N R S D Q R R V V E  
D F E V E N A V L G\_K D\_F\_K L\_S\_I T F\_R N\_N S\_H N R\_Y T I T  
  
A Y I S G N V V F Y T G V T S A E F M L R D P T V T M K P N  
A\_Y\_L S\_A N\_I T F\_Y\_T\_G\_V\_P K A\_E\_F\_K K E T F D V\_T\_L E P\_L  
  
E \ / T V K E T V V V E S K K Y M K H L V E Q A N L H F I I T G  
S / \ F K K\_E\_A V\_L I Q A G E Y\_M\_G Q L\_L E\_Q\_A\_S L\_H\_F\_F V T\_A  
  
K V K E T G Q I V T A M K V V A L H N P K L S V K \ / V S G E N  
R I N E\_T\_R D V L A K Q K\_S T V L\_T I P\_E I I I K\_ / \ V\_R\_G\_T\_Q  
  
R V S E E M M A T V E F T N P F S F A L A D V Y I R M E G P  
V V\_G S D M\_T V I V\_E\_F\_T\_N\_P\_L K E T L\_R N V\_W V H L D G\_P\_  
  
G V M M P T Y K Y Y S \ / L I P N G S S L T W T E M F V P Q R A  
G\_V\_T R P\_M K K\_M F R / \ E I\_R P N S\_T V Q W\_E E\_V C R P\_W V S  
  
G A T R V F A T L D C P A L R Q V Q G E V S L T I K P  
G\_H R K L I A\_S M S S D S L\_R\_H V\_Y G\_E\_L D V Q I\_Q R R P\_S

M

FUF8 >fugu f8 candidate on scaffold2929

(sequence length=1583)

HSF8 >gi|66384|pir||EZHU coagulation factor VIII precursor [validated] - huma

(sequence length=2351)

Number of matches = 658

Fraction of identities per length = 0.415666

M R T D T L L L P L P L P L L L  
M\_Q I E L S T C F F L\_C L\_L R F C F S A T R R Y Y L\_G A V E  
  
L V A A F C G G D A Q Q P P A A V R Q Y Y I  
L\_S W D Y M Q S D\_L G E L P V D A R / \ F P\_P\_R V P K S F P F N  
  
A A V E I G W D Y I H V E D G D P A S E Q R \ / G I  
T S V\_V Y K K T L F V E F T D\_H L F N I A K P\_R P P W M / \ G\_L  
  
Q G P V I V A Q A G E T V L V H F K N L A S Q P Y S I S P V  
L\_G\_P\_T I\_Q A\_E V Y D T\_V\_V I T L K\_N\_M A\_S\_H P\_V S\_L H A V\_  
  
G I S Y W K H S E G \ / A G Y D D S T A G H E K E D D A V Y P G  
G\_V\_S\_Y\_W\_K\_A\_S\_E\_G\_ / \ A\_E Y\_D\_D\_Q T\_S Q R E\_K\_E\_D\_D\_K V\_F P\_G  
  
G Y Y E Y V W D I S P K D G P T G S D P E C L T Y S Y S S Q  
G\_S H T Y\_V\_W\_Q V L K E N G\_P\_M A S\_D\_P\_L C\_L\_T\_Y\_S\_Y\_L S\_H  
  
V D P V R D V N S G L I G A L L I C K \ / M S A F T D E G Q R R  
V\_D\_L V\_K\_D\_L N\_S\_G\_L\_I\_G\_A\_L\_L\_V C\_R / \ E G S L A K E\_K T Q T  
  
N Q A F V L L F V V F D E S K S W Y G E V G E R K S R D K  
L H K F\_I L\_L\_F\_A V\_F\_D\_E\_ / \ G K\_S\_W\_H S E\_T K N S L M Q\_D\_R D



F K R S D S R K E F H T I N G Y I N A T L P \ / L K I C Q G R  
A A S A R A W P K M H \_ T \_ V \_ N \_ G \_ Y \_ V \_ N \_ R \_ S \_ L \_ P \_ / \ G L I G C H R \_

N P V I W H L I G M G T A P A I H L I Q F Q H H T L E \ / V L T  
K S V \_ Y \_ W \_ H \_ V \_ I \_ G \_ M \_ G \_ T \_ T \_ P \_ E \_ V \_ H \_ S \_ I \_ F \_ L \_ E \_ G \_ H \_ T \_ F \_ L \_ V \_ R \_ N \_

H R K V T V E V T P M T F V T A E M K P A T V G S F L I S C  
H \_ R \_ Q \_ A \_ S \_ L \_ E \_ I \_ S \_ P \_ I \_ T \_ F \_ L \_ T \_ A \_ Q \_ T \_ L \_ L \_ M \_ D \_ L \_ G \_ Q \_ F \_ L \_ L \_ F \_ C \_

Q I H A P R H \ / D G M S A M F L V E K C P D P V V L P G P D M  
H I S S H Q H \_ / \ D \_ G \_ M \_ E \_ A \_ Y \_ V \_ K \_ V \_ D \_ S \_ C \_ P \_ E \_ E P \_ Q \_ L \_

R N A K P S N D D D Y D Y N Y D G E E M F N I I N F K P K E  
R \_ M \_ K \_ N \_ N \_ E \_ E \_ A \_ E \_ D \_ Y \_ D \_ D \_ D \_ L \_ T \_ D \_ S \_ E \_ M \_ D V V R F \_ D \_ D \_ D \_ N \_

L K P Q V R S S R G A N F Q V W E H Y I A I E E L T W D  
S P S F I Q \_ I \_ R \_ S \_ V \_ A \_ K \_ K \_ H \_ P \_ K \_ T \_ W \_ V \_ H \_ Y \_ I \_ A \_ A \_ E \_ E \_ E \_ D \_ W \_ D \_

Y T P H L S S P T S S E L Q S R F F P T S A S R L S Y K Y K  
Y \_ A \_ P \_ L \_ V \_ L \_ A \_ P \_ D \_ D \_ R \_ / \ S Y K S \_ Q \_ Y \_ L \_ N \_ N \_ G \_ P \_ Q \_ R \_ I \_ G \_ R \_ K \_ Y \_ K \_

K V A F V E Y T D K S F T R R K N T E K S L M G P L L K  
K \_ V \_ R \_ F \_ M \_ A \_ Y \_ T \_ D \_ E \_ T \_ F \_ K \_ T \_ R \_ E \_ A \_ I \_ Q \_ H \_ E \_ S \_ G \_ I \_ L \_ G \_ P \_ L \_ L \_ Y \_

G K V G D Q I \ / H I M L K N T A S R P F N I Y P N G L S S I R  
G \_ E \_ V \_ G \_ D \_ T \_ L \_ / \ L I I F K N \_ Q \_ A \_ S \_ R \_ P \_ Y \_ N \_ I \_ Y \_ P \_ H \_ G \_ I \_ T \_ D \_ V \_ R \_

P M \ / K R S K N G K L E K D L R T M G V G P N E T F G Y I W E  
P \_ L \_ Y S R R L P K \_ G \_ / \ V K H L \_ K \_ D \_ F \_ P \_ I \_ L \_ P \_ G \_ E \_ I \_ F \_ K \_ Y \_ K \_ W \_ T \_

L T A N D R P L E E D P Q C L T Q L Y Q S T V D P E K D L A  
V \_ T \_ V \_ E \_ D \_ G \_ P \_ T \_ K \_ S \_ D \_ P \_ R \_ C \_ L \_ T \_ R \_ Y \_ Y \_ S \_ S \_ F \_ V \_ N \_ M \_ E \_ R \_ D \_ L \_ A \_

S G L V G T L L I C K N E A I D Q R G R L \ / V G P D K D W S L  
S \_ G \_ L \_ I \_ G \_ P \_ L \_ L \_ I \_ C \_ Y \_ K \_ E \_ S \_ V \_ D \_ Q \_ R \_ G \_ N \_ Q \_ / \ I M S D \_ K \_ R \_ N \_ V \_ I \_

V F A V F D E N N S W Y M K E N I H N T T Q T P T G Y N D T  
L \_ F \_ S \_ V \_ F \_ D \_ E \_ N \_ R \_ S \_ W \_ Y \_ L \_ T \_ E \_ N \_ I \_ Q \_ R \_ F \_ L \_ P \_ N \_ P \_ A \_ G \_ V \_ Q \_ L \_ E \_

D P D V Y N S H V I Y S E F N G Y F I D \ / A V N G I M F R R  
D \_ P \_ E \_ F Q A S N I \_ M \_ H \_ S \_ / \ I N G \_ Y \_ V \_ F \_ D \_ S L Q L S V C L H E

R Q F V I C K T D \ / R G H L T E F L S V Y F T G N L F Q H Q G  
V A Y W Y I L S I G A Q T \_ D \_ F \_ L \_ S \_ V \_ F \_ F \_ S \_ G \_ Y \_ T \_ F \_ K \_ H \_ K \_ M \_

L Y Q S V L T L F P M S G L T V S M E P E V V \ / G E W E I G A  
V \_ Y \_ E \_ D \_ T \_ L \_ T \_ L \_ F \_ P \_ F \_ S \_ G \_ E \_ T \_ V \_ F \_ M \_ S \_ M \_ E \_ N \_ P \_ / \ G \_ L \_ W \_ I \_ L \_ G \_ C \_

F D G S L K S R G M S I Q Y T V L T C E R E  
H N S D F R N R \_ G \_ M \_ T A L L K V \_ S \_ S \_ C \_ D \_ K \_ N \_ T \_ G \_ D \_ Y \_ Y \_ E \_ D \_ S \_

Y E D I S A Y L L S K N N A I E P R S F S Q N S R H P S T R

Q K Q F N A T T I P E N D I E K T D P W F A H R T P M P K I

Q N V S S S D L L V D H E L D E V D  
Q N V S S S D\_L\_L\_M L L R Q S P T P H\_G L S L S D L\_Q E\_A K

F S D Y V D N M V L G L R G M R P R N H  
Y E T F S D\_D P S P G\_A I D S N N S L\_S E M\_T H F R\_P\_Q L H

H S G D M V F T P E S T V L L K V C N K V P I N N S T H  
H S G D M V F T P E S G L Q\_L\_R L N E K\_L G T T A A T\_E L K

K L D F K V S S T S N N L I S T I P S D N L\_A A\_G T D N T S  
K L D F K V S S T S N N L I S T I P S D N L\_A A\_G T D N T S

Y L K K V T L T P P  
S L\_G P P S M P V H Y D S Q L D T T L F G K K\_S S P L\_T\_E S

G G  
G\_G\_P L S L S E E N N D S K L L E S G L M N S Q E S S W G K

N V S S T E\_S G R L F K G\_K\_R\_A H G P A L\_L T K D N A L\_F K  
N V S S T E\_S G R L F K G\_K\_R\_A H G P A L\_L T K D N A L\_F K

V S I S L L K T N K T S N N S A T N R K T H I D\_G\_P S L L I  
V S I S L L K T N K T S N N S A T N R K T H I D\_G\_P S L L I

T A A P S  
E N S P\_S\_V W Q N I L E S D T E F K K V T P L I H D R M L M

D K N A T A L\_R\_L N H M S N K T T S S K N M E M V Q Q K K E  
D K N A T A L\_R\_L N H M S N K T T S S K N M E M V Q Q K K E

G P I P P D A Q N P D\_M S F F K M L F L P E S A R W I Q R T  
G P I P P D A Q N P D\_M S F F K M L F L P E S A R W I Q R T

H G K N S L N S G Q G\_P S P K Q L V S L G\_P E\_K S\_V E G Q N  
H G K N S L N S G Q G\_P S P K Q L V S L G\_P E\_K S\_V E G Q N

F L S E K N K V V V G K G E F T K D V G L K E M V F P S S R  
F L S E K N K V V V G K G E F T K D V G L K E M V F P S S R

N L F L T N L D N L H E\_N N T H N\_Q E K K I Q E E I\_E K K E  
N L F L T N L D N L H E\_N N T H N\_Q E K K I Q E E I\_E K K E

E L E E G N E I L  
T L\_I Q E N\_V V L\_P Q I H T V T G T K N F M K N L F L L S T

R Q N V E G S Y D G A Y A P V L Q D F R S L N D S T N R T K  
R Q N V E G S Y D G A Y A P V L Q D F R S L N D S T N R T K

K H T A H F S K K G E E E N L\_E G\_L G N Q T K Q I V E K Y A  
K H T A H F S K K G E E E N L\_E G\_L G N Q T K Q I V E K Y A

C T T R I S P\_N T S\_Q Q N F\_V T Q R S K R A L K Q F R L\_P\_L  
C T T R I S P\_N T S\_Q Q N F\_V T Q R S K R A L K Q F R L\_P\_L

T S E E M V Q N Y I M S E E E K L K P  
E E T E\_L E K R I I\_V D D T S T Q W S K N M K H L\_T P\_S T L

HHQQPGNIAVNELS  
TQIDYNEKEKG\_AITQSPL\_S\_DCLTRSHSIPQ  
ANRSPLPIAKVSSFP S I R P I Y L T R V\_L F Q D\_N  
Y N Q E E  
SSHLPAAASY\_RKKKDSGVQESSHFLQGAKKNN  
NSTSY  
LSLAILTLEMTGDQREVGS LGTSA TN\_S\_VTY\_  
VL  
KKVENTV\_L\_PKPDLPKTS GKVELLPKVHIYQ  
STDYMDL  
KDLFPTEETSNGS\_PGHLD\_L\_VEGSLLQGTEGA  
RSGEVRY  
IKWNEANR\_PG\_KV\_PFLRVATESSAKTPSKLL  
DPLAWDNHYGTQIPKEEWKSQEKSP EK T A F  
KKKDTILSLNACESNHAAI A A I N E G Q N K P E I  
EVTWAKQGRTERLCSQNPPLKRHQREITR  
TTLQSDQEEIDYDDTISVEMKKEDFDIYDE  
PHY Y I A A E E V T W D Y G V K  
DENQSPRSFQKKTRHY\_FIA\_A\_V E\_R L W\_D\_Y\_G\_M S  
KPYQLIRP \ / S R G M R K F L P Q Y K K V V Y R A Y K D E  
SSPHVLR\_ / \ N R\_A Q S G S V P\_Q\_F K\_K\_V\_V\_F Q E F T D\_G  
SFRDPVSQGELEAHLGLGPFIKA EVND \ / LL  
S\_FTQP\_LYRGE\_L\_NEH\_L\_G\_L L\_G\_P\_Y I\_R A\_E\_V\_E D\_ N I  
TV VFKNNASRPYSFHLHGV YDRNQGASGV  
MV\_ / \ TFRNQASRPYSFYS S L I S Y\_E E D Q\_R Q G A E  
PGKPLA PGEVQTYNWRLTKTQGPMDSEFD  
P\_R\_K\_N F V K P\_N E\_T K T\_Y\_F W\_K V Q H H M A P\_T K D E\_F\_D\_  
CKTGTYYS TVDK \ / EEDLNSGLIGPLVICPKP  
C\_K\_A\_W\_A\_Y\_F S\_D V\_D\_L / \ E\_K D\_V H S\_G\_L\_I\_G\_P\_L\_L V\_C\_H\_T N  
TLSTRLHT \ / QPDVQEFALLFHTFDETKSWYM  
T\_L\_N P A H G R Q\_V T V\_Q\_E\_F\_A\_L\_F F\_T I F\_D\_E\_T\_K\_S\_W\_Y\_F  
EENLRRYCAPPC HANTQDPWYHISNKFA \ / A I  
T\_E\_N\_M\_E\_R\_N C\_R A P\_C\_N I Q M E D\_P\_T F K E N Y R F\_H / \ A\_I\_

N G Y V A E S L P G L L V A Q H Q R V R W H L L N V G S D G  
 N\_G\_Y\_I M D T L\_P\_G\_L\_V M A\_Q\_D Q\_R\_I R\_W\_Y L\_L\_S M G\_S\_N E  
  
 E Y H A V H F H G L P F T V H A K K E H R M G V Y N L F P \ / G  
 N I H\_S I H\_F\_S G\_H V F\_T\_V\_R K K\_E E\_Y K M\_A L Y\_N\_L\_Y P\_ / \ G\_  
  
 V F G T V E M R P P T V G T W L V E C T V G E S Q L A G M R  
 V\_F\_E\_T\_V\_E\_M\_L P\_S K A G\_I W\_R V\_E\_C\_L I G\_E\_H L H A\_G\_M\_S  
  
 A K L L V Y N P \ / Q C S R P L G M K S G R I G D S Q I K A S D  
 T L F\_L\_V\_Y\_S\_N / \ K C\_Q T P\_L\_G\_M\_A S\_G\_H I\_R D\_F Q\_I\_T\_A\_S\_G  
  
 Y I G N I L I F I S P V R S  
 Q\_Y\_G\_ / \ Q W A P K L A R L\_H Y S G S I N A W S T K E P F S W I  
  
 K R N L G Y R V Q T Q G V R S N L R N N Y I T A F  
 K\_V\_D\_L\_L A P M I I H G I K T\_Q\_G\_A R\_Q K F S S L Y\_I\_S Q F\_  
  
 T V S Y S L D Q E T W S T Y R G S \ / G S S R S S S S S T A \ / K V  
 I I M Y\_S\_L\_D\_G K K W\_Q T\_Y\_R\_G\_ N S\_T G T\_L M / \ V\_  
  
 F N G N L D N S R V K N N P F V P P F V A R Y I R I H P L Y  
 F\_F\_G\_N\_V\_D\_S\_S\_G I K\_H N\_I F\_N P\_P\_I I A\_R\_Y\_I\_R\_L H\_P\_T H  
  
 Y N Q R P A L R M E L L G C D L N \ / S C S L P L G L Q D R R I  
 Y\_S I R\_S T L\_R M E\_L M G\_C D\_L N\_ / \ S\_C\_S M P\_L\_G M E S K A I\_  
  
 P D E S F V A S S S Y W S L L R S W T P S L A R L H Q E G S  
 S\_D\_A\_Q\_I\_T\_A\_S\_S\_Y F T N M F A T W\_S P\_S\_K\_A\_R\_L\_H\_L\_Q\_G\_R  
  
 A N A W R P K \ / N N N P H E W L Q V D L G K V K R I T G V V T  
 S\_N\_A\_W\_R\_P\_Q / \ V N N\_P\_K E\_W\_L\_Q\_V\_D\_F Q\_K\_T M K V T\_G\_V\_T T\_  
  
 Q G A R S L L T K M M V T E F S V T I S R D G Q A W S S \ / V L  
 Q\_G\_V K\_S\_L\_L\_T\_S M\_Y V\_K E\_F\_L I S S S\_Q D\_G\_H Q W\_T L F F  
  
 E G S S Q R E K I F Q G N N D S D E E A L T I F D A P L F G  
 Q\_N G K V K\_ / \ V\_F\_Q\_G\_N\_Q D\_S\_F T P V V N S L D\_P\_P\_L\_L T  
  
 R Y I R I H P L G W I N D I A L R L E V L G C D T Q Q A L  
 R\_Y\_L R\_I\_H\_P\_Q S W\_V H Q I\_A\_L\_R\_M E\_V\_L\_G\_C\_E A Q\_D\_L Y

GAFU >fugu gamma on scaffold 39  
 (sequence length=442)  
 GAHU >gi|4503715 fibrinogen, gamma chain  
 (sequence length=437)

Number of matches = 223  
 Fraction of identities per length = 0.510297

M L L A I R T V N K L C S W L H Q E E T L W T P \ / V T E  
 M S W S L\_H P R N L I L Y F Y A L L\_F L S S T\_C V A / \ Y V\_A T  
  
 R S F L S C C T F L G S P T S \ / G M Y C P T K C G V A D Y M L  
 R\_D N C\_C\_I L D E R F G\_S\_Y\_C\_P\_T\_T\_C\_G\_I\_A\_D\_F L S

K Y F S     K T N D G L E Q M L I D L E N I A N M T Q D A E N R  
 T Y\_Q T /\ K\_V D K                     D\_L\_Q S L E D I L H Q V E\_N\_K  
  
 V V Y M K D S M V A A Q K S I T P G \/ N T T N     I N P L E T S T  
 T S E V K\_Q L I K A\_I Q\_L T Y N P\_D     E S S K /\ P N\_M I D A A T\_  
  
       K S S M L D D V V R F Q K T I S V Q E Q Q I R \/ E V Q N M  
 L K S R I M\_L E E I M K Y E A S I\_L T H D S S I\_R\_/\ Y L\_Q\_E I  
  
 V S S N E R R M S E L K Q L S L Q L Q Q K C S E P C K D S V  
 Y N S\_N\_N Q K I V N L\_K\_E K V A Q\_L E A Q C\_Q E\_P\_C\_K\_D\_T V\_  
  
 E I Q P I S G T \/ D C Q D I A N K G A T T S G L Y Y V K P Q K  
 Q I\_H D I\_T G\_K /\ D\_C\_Q\_D\_I\_A\_N\_K\_G\_A\_K Q S\_G\_L\_Y\_F I K\_P\_L K\_  
  
 A T E Q F L V Y C E I D A F G R G F T V I Q R \/ R R D G S V D  
 A\_N Q\_Q\_F\_L\_V\_Y\_C\_E\_I\_D\_G S G\_N G\_W T\_V\_F Q\_K /\ R\_L\_D\_G\_S\_V\_D  
  
 F K K D W I Q Y R E G F G Y L S P D D T T E F W L G N E K I  
 F\_K\_K\_N\_W\_I\_Q\_Y\_K E\_G\_F\_G\_H L\_S\_P\_T G T\_T\_E\_F\_W\_L\_G\_N\_E\_K\_I\_  
  
 H L L T A S T T M P T V L R I E L V D W E G N K K \/ Y A D Y N  
 H\_L\_I S T Q S A I P\_Y A L\_R\_V E\_L\_E D\_W\_N\_G\_R T S /\ T A\_D\_Y\_A  
  
 M F R I G S E A D K Y R L T Y G F Y F G G D A E D A F D G Y  
 M\_F\_K V G\_P E\_A D K Y R L T Y\_A Y F A G\_G\_D\_A\_G D\_A\_F\_D\_G\_F  
  
 D F G D D P S D K S Y T S H N G M Q F S T F D S D N D R Y D  
 D\_F\_G\_D\_D\_P\_S\_D\_K\_F F T\_S\_H\_N\_G\_M\_Q\_F\_S\_T\_W D\_N D\_N\_D\_K F E  
  
 G N C A Q Q D G S G W W M N R C H A A H L N G K Y Y S \/ G G R  
 G\_N\_C\_A\_E\_Q\_D\_G\_S\_G\_W\_W\_M\_N\_K C\_H\_A\_G\_H\_L\_N\_G\_V\_Y\_Y\_Q /\ G\_G\_T  
  
 Y S E K D A G E F G F D N G I I W V T W H S R W Y S L K E T  
 Y\_S\_    K A S T P N G\_Y D\_N\_G\_I\_I\_W\_A T\_W\_K T R\_W\_Y\_S\_M K\_K T\_  
  
 T M K L I P L S R L A A G G             Q T T G V K E     F G G L G  
 T\_M\_K\_I\_I\_P\_F\_N\_R\_L\_T I\_G\_E G Q Q H H L G\_G\_A\_K\_Q /\ A\_G\_D V  
  
 L

FPAI >Fugu plasminogen activator inhibitor on scaf1754  
 (sequence length=406)  
 HPAI >gi|189545|gb|AAA36413.1| plasminogen activator inhibitor  
 (sequence length=415)

Number of matches = 181  
 Fraction of identities per length = 0.445813

M A A I S G S N T A F A L E L L R T L S Q G N P S G N I F V  
 M\_E D L C V A N\_T\_L F\_A\_L\_N L\_F K H L\_A K A S P\_T Q N\_L F\_L  
  
 S P L S I S S A L A M V Y L G A K G E T A A Q M A Q V M D S  
 S\_P\_W S\_I\_S\_S\_T M A\_M\_V\_Y\_M G\_S R G\_S T\_E D Q\_M\_A\_K V\_L Q F

N G R I E S L Q W D K S D F P C L Q A L S F  
 N\_E V G\_A N A V T P M T P E N F\_T S C\_G F M Q\_Q I Q K G S\_Y  
  
 S S G K D V H A D F Q T L N G E I N S P S A S  
 P D A I L Q A Q A A D K I H\_S S F\_R S L\_S S A I\_N\_A S T G D  
  
 Y T L K L A N R L Y G E S T A N F L S V G S G F T P I T N C  
 Y\_L L\_E S V\_N\_K L\_F G\_E\_K S A\_S F\_ R E E Y I R L C\_  
  
 Q K Y Y H A D L K A I D F I G A T E E C R A E I N S W V E E  
 Q\_K\_Y\_Y\_S S E P Q A\_V D\_F\_L E C A E\_E\_A R\_K K I\_N\_S\_W\_V\_K T  
  
 Q T E N K I K D L L K P G T V S T M T R L A L V N A I Y F K  
 Q\_T\_K\_G\_K\_I\_P N L\_L\_P E G\_S V\_D G D T\_R\_M V L\_V\_N\_A V Y\_F\_K\_  
  
 G N W M N R F D E A N T K E M P F K V N Q N E S K P V Q M M  
 G\_K\_W\_K T P F\_E K K L N G L Y P\_F\_R V\_N\_S A Q R T P\_V\_Q\_M\_M\_  
  
 Y Q M K K L P Y N Y I P E H G V Q I L E L P Y V E E E L S M  
 Y\_L R E K\_L\_N I G Y\_I\_E D L K A Q\_I\_L\_E\_L\_P\_Y\_ A G D V S\_M\_  
  
 F I L L P E E T T D G P S P L L K L E N E L T R E K L D E W  
 F\_L\_L\_L\_P\_D E\_I A D\_V S T G L\_E L L\_E\_S E\_I T\_Y D K\_L\_N K W\_  
  
 T N R E N M D V H S E V L V H L P K F K L E E D Y E M N E A  
 T\_S K D K M\_ A E D E\_V\_E V\_Y I P\_Q F\_K\_L\_E\_E\_H Y\_E\_L R S I  
  
 L A K L G M T D V F C A A K A D L S G M N G D G G L F L S T  
 L\_R S M G\_M\_E D\_A F\_N K G R A\_N F S\_G\_M\_S E R N D L\_F\_L\_S\_E  
  
 V A H K A F V E V N E E G T E A A A A T A G M V A F C M L R  
 V\_F H\_Q A M V\_D V\_N E E G T E A A A G T\_G G\_V M T G R T G H  
  
 E E H F T A D H P F L F F I R H N K T K S I L F L G R Y S  
 G G P Q F\_V A\_D\_H\_P\_F\_L\_F\_L I\_M H\_K I T\_K\_C I\_L\_F\_F G\_R\_F C  
  
 S P  
 S\_P\_

FTPA >fugu tPA candidate

(sequence length=524)

HTPA >gi|4505861| t-plasminogen activator [Homo sapiens]

(sequence length=524)

Number of matches = 294

Fraction of identities per length = 0.561069

\/ V Y C V D S K T S A M R S S G E T W L R W R G Q R V E Y  
 /\ V\_I C\_R D\_E K\_T\_Q M I Y Q Q H Q S W\_L\_R\_P V L R\_S N R\_V\_E\_Y\_  
  
 C R C A R G R E L C H I V P V I \/ S C Y T S Q C Y N G G T C K  
 C\_W C\_N S G\_R\_A Q C\_H\_S V\_P\_V\_K /\ S\_C\_S E P R C\_F N\_G\_G\_T\_C\_Q  
  
 E A V Y T S D Y I C Q C P T G F S G T H C E I \/ D T N E K C A  
 Q A\_L Y\_F S\_D\_F V C\_Q\_C\_P\_E G\_F\_A G\_K C C\_E\_I\_/\ D\_T\_R A T C\_Y

V G R G E G Y R G T W S I S H S G A E C I N W N S T T L R G  
E D Q G \_ I S Y \_ R \_ G \_ T \_ W \_ S \_ T \_ A \_ E \_ S \_ G \_ A \_ E \_ C \_ T \_ N \_ W \_ N \_ S \_ S \_ A \_ L \_ A \_ Q

R R F T A R K T D A S S L G L G N H N F C R \ / N P D N D S T P  
K P Y S G R \_ R P D \_ A \_ I R L \_ G \_ L \_ G \_ N \_ H \_ N \_ Y \_ C \_ R \_ / \ N \_ P \_ D \_ R \_ D \_ S \_ K \_ P \_

W C F V Y K G T Q I V W E F C S V P K C P E D \ / R Y H E C M L  
W \_ C \_ Y \_ V \_ F \_ K \_ A \_ G \_ K \_ Y \_ S \_ S \_ E \_ F \_ C \_ S \_ T \_ P \_ A \_ C \_ S \_ E \_ G \_ / \ N \_ S \_ D \_ C \_ Y \_ F

G S G L T Y R G T A S V T K S G S R C L P W D N P A I T H K  
G \_ N \_ G \_ S \_ A \_ Y \_ R \_ G \_ T \_ H \_ S \_ L \_ T \_ E \_ S \_ G \_ A \_ S \_ C \_ L \_ P \_ W \_ N \_ S \_ M \_ I \_ L \_ I \_ G \_ K \_

L N N A W R S D A L K L G L G G H N F C R \ / N P D G D V G P W  
V Y T A \_ Q N P S A \_ Q A L \_ G \_ L \_ G \_ K \_ H \_ N \_ Y \_ C \_ R \_ / \ N \_ P \_ D \_ G \_ D \_ A \_ K \_ P \_ W \_

C H V Y K N M R L T W E L C D V P K C \ / S T C G Q R L D N T L  
C \_ H \_ V \_ L \_ K \_ N \_ R \_ R \_ L \_ T \_ W \_ E \_ Y \_ C \_ D \_ V \_ P \_ S \_ C \_ S \_ T \_ / \ C \_ G \_ L \_ R \_ Q \_ Y

N H P V F R M F G G R E S D I T E Q P W Q A V I N V F Q R R  
S Q P \_ Q \_ F \_ R \_ I \_ K \_ G \_ G \_ L \_ F \_ A \_ D \_ I \_ A \_ S \_ H \_ P \_ W \_ Q \_ A \_ A \_ I \_ F \_ A \_ K \_ H \_ R \_ R \_

Y K Q H L Y R C G G V L I D S C W I L T A A H C F E E \ / N E K  
S P G E R F L C \_ G \_ G \_ I \_ L \_ I \_ S \_ S \_ C \_ W \_ I \_ L \_ S \_ A \_ A \_ H \_ C \_ F \_ Q \_ E \_ / \ R F P

V E N L E V I L G R T F R K M N S S S E Q I F G V E K Y L I  
P H H L \_ T \_ V \_ I \_ L \_ G \_ R \_ T \_ Y \_ R \_ V \_ V \_ P \_ G \_ E \_ E \_ E \_ Q \_ K \_ F \_ E \_ V \_ E \_ K \_ Y \_ I \_ V

H E K F E S E T F D N D I \ / A L L K L K T D I G I C A I N S P  
H \_ K \_ E \_ F \_ D \_ D \_ D \_ T \_ Y \_ D \_ N \_ D \_ I \_ / \ A \_ L \_ L \_ Q \_ L \_ K \_ S \_ D \_ S \_ S \_ R \_ C \_ A \_ Q \_ E \_ S \_ S

E V Y P V C L P E R G L V L P D W T E C E I S G Y G K T T E \ /  
V \_ V \_ R \_ T \_ V \_ C \_ L \_ P \_ P \_ A \_ D \_ L \_ Q \_ L \_ P \_ D \_ W \_ T \_ E \_ C \_ E \_ L \_ S \_ G \_ Y \_ G \_ K \_ H \_ E \_ / \

F V S A E Y S E R V K R G H V R L W P N E R C V P D V L S G  
A L S \_ P \_ F \_ Y \_ S \_ E \_ R \_ L \_ K \_ E \_ A \_ H \_ V \_ R \_ L \_ Y \_ P \_ S \_ S \_ R \_ C \_ T \_ S \_ Q \_ H \_ L \_ L \_ N

R T V T S N M L C A G D T R G R D D A C K \ / G D S  
R \_ T \_ V \_ T \_ D \_ N \_ M \_ L \_ C \_ A \_ G \_ D \_ T \_ R \_ S \_ G \_ G \_ P \_ Q \_ A \_ N \_ L \_ H \_ D \_ A \_ C \_ Q \_ / \ G \_ D \_ S \_

G G P L V C R N N D R M T L M G V I S W G D G C G Q K D K P  
G \_ G \_ P \_ L \_ V \_ C \_ L \_ N \_ D \_ G \_ R \_ M \_ T \_ L \_ V \_ G \_ I \_ I \_ S \_ W \_ G \_ L \_ G \_ C \_ G \_ Q \_ K \_ D \_ V \_ P \_

G V Y T R V T R Y I D W I N G G M K A N P L  
G \_ V \_ Y \_ T \_ K \_ V \_ T \_ N \_ Y \_ L \_ D \_ W \_ I \_ R \_ D \_ N \_ M \_ R \_ P

FUTF >fugu tissue factor on scaf8956 238a  
(sequence length=264)  
HSTF >gi|418689|pir||KFHU3 tissue factor precursor [validated] - huma  
(sequence length=295)

Number of matches = 88  
Fraction of identities per length = 0.333333

M K C S A L F L M L L L H C V R  
M \_ E \_ T \_ P \_ A \_ W \_ P \_ R \_ V \_ P \_ R \_ P \_ E \_ T \_ A \_ V \_ A \_ R \_ T \_ L \_ L \_ L \_ G \_ W \_ V \_ F \_ A \_ Q \_ V \_ A

S V S \ / A S Y P R      A Y N V T W K S T N F K T V L T W D P K  
G A S \_ / \ G T T N T V A A \_ Y \_ N \_ L \_ T \_ W \_ K \_ S \_ T \_ N \_ F \_ K \_ T \_ I \_ L \_ E \_ W \_ E \_ P \_ K \_  
  
P S H L Y S Y T V E F      F R \ / I G G D K M R N P H C I R S S F P  
P \_ V \_ N \_ Q    V \_ Y \_ T \_ V \_ Q \_ I \_ / \ S T      K S G \_ D \_      W K S K C \_ F \_ Y \_ T \_ T \_ D \_ T  
  
Q C D L S N S    L T E L R S S Y M A E I L S E P P      L G E  
E C \_ D \_ L \_ T \_ D \_ E \_ I \_ V \_ K \_ D \_ V \_ K \_ Q \_ T \_ Y \_ L \_ A \_ R \_ V \_ F \_ S \_ Y \_ P \_ A \_ G \_ N \_ V \_ E \_ S  
  
T S E L T E F P Y S R S P R F C P Y N D \ / T D I G K P D F K L  
T \_ G \_ S \_ A \_ G \_ E \_ P \_ L \_ Y \_ E \_ N \_ S \_ P \_ E \_ F \_ T \_ P \_ Y \_ L \_ E \_ / \ T \_ N \_ L \_ G \_ Q \_ P \_ T \_ I \_ Q  
  
E V S A D K K K T S L F V T D P L T A L F K D G R Q L N I R  
S F E Q V G T K \_ V \_ N \_ V \_ T \_ V \_ E \_ D \_ E \_ R \_ T \_ L \_ V \_ R \_ R \_ N \_ N \_ T \_ F \_ L \_ S \_ L \_ R \_  
  
D I F S D Q L M Y K V T Y R K N K S T G K \ / K E H I S K T N V  
D \_ V \_ F \_ G \_ K \_ D \_ L \_ I \_ Y \_ T \_ L \_ Y \_ Y \_ W \_ K \_ S \_ S \_ S \_ S \_ G \_ K \_ / \ K \_ T \_ A \_ K \_ T \_ N \_ T \_ N \_ E  
  
I E L T N L D Q G E S Y C F S I Q A Y I P S R T I T K Q  
F    L \_ I \_ D \_ V \_ D \_ K \_ G \_ E \_ N \_ Y \_ C \_ F \_ S \_ V \_ Q \_ A \_ V \_ I \_ P \_ S \_ R \_ T \_ V \_ N \_ R \_ K \_ S \_ T  
  
                  L G E E S \ / S                    K H C F                    A L A T F G                    Q  
D S P V E C M G \_ Q \_ E \_ K                    G E F / \ R E I F \_ Y \_ I \_ I \_ G \_ A \_ V \_ V \_ F \_ V \_ V \_ I \_ I  
  
M S S Y M N V    L                    C K R P A E W N L F T V I S K Y L P L  
L V I I L A I S L \_ H \_ K \_ C \_ R \_ K \_ A \_ G \_ V \_ G \_ Q \_ S \_ W \_ K \_ E \_ N \_ S \_ P    L \_ N \_ V  
  
L  
S

FPLG >suspect fugu plasminogen from scaf9368 and scaf145  
(sequence length=747)  
HSPG (16->810=795)>gi|4505881|ref|NP\_000292.1| plasminogen [Homo sapiens  
(sequence length=795)

Number of matches = 420  
Fraction of identities per length = 0.562249

\ / S V S G S E V E G Y T K T A G A W I L S L S G R K Y S V M T  
/ \ S \_ G \_ Q \_ G \_ E \_ P \_ L \_ D \_ D \_ Y \_ V \_ N \_ T \_ Q \_ G \_ A \_ S \_ L \_ F \_ S \_ V \_ T \_ K \_ K \_ Q \_ L \_ G \_ A \_ G \_ S  
  
A V E C A R K C D A E T T F T C R \ / S F I Y I E K D Q E C R T  
I E E \_ C \_ A \_ A \_ K \_ C \_ E \_ E \_ D \_ E \_ E \_ F \_ T \_ C \_ R \_ / \ A F \_ Q \_ Y \_ H \_ S \_ K \_ E \_ Q \_ Q \_ C \_ V \_ I  
  
V G Q N S K S E I V L R R S S T A L Y E K K \ / V Y L L E C V N  
M A E N \_ R \_ K \_ S \_ S \_ I \_ I \_ I \_ R \_ M \_ R \_ D \_ V \_ V \_ L \_ F \_ E \_ K \_ K \_ / \ V \_ Y \_ L \_ S \_ E \_ C \_ K \_ T  
  
G I G T D Y R G T K S R T K T G K L C Q R W G V N S P H R P  
G \_ N \_ G \_ K \_ N \_ Y \_ R \_ G \_ T \_ M \_ S \_ K \_ T \_ K \_ N \_ G \_ I \_ T \_ C \_ Q \_ K \_ W \_ S \_ S \_ T \_ S \_ P \_ H \_ R \_ P \_  
  
N \ / Y K P Q T S P L A D L E S N F C R N P D A D S G G P W C Y  
R / \ F S P \_ A \_ T \_ H \_ P \_ S \_ E \_ G \_ L \_ E \_ E \_ N \_ Y \_ C \_ R \_ N \_ P \_ D \_ N \_ D \_ P \_ Q \_ G \_ P \_ W \_ C \_ Y \_  
  
T T D A N T R W E H C N V S A C S \ / E D C I H C S G E D Y R G  
T \_ T \_ D \_ P \_ E \_ K \_ R \_ Y \_ D \_ Y \_ C \_ D \_ I \_ L \_ E \_ C \_ E \_ / \ E \_ E \_ C \_ M \_ H \_ C \_ S \_ G \_ E \_ N \_ Y \_ D \_ G \_



K A S T T E K G Y T C Q R W D S K \ / Y  
K\_I\_S\_K\_T\_M\_S\_G\_L\_E\_C\_Q\_A\_W\_D\_S\_Q\_S\_P\_H\_A\_H\_G\_Y\_I\_P\_S\_K\_\ / F P

L E G N Y C R N P D G D P R P W C F T T N P A K R W D  
N K N L\_K\_K\_N\_Y\_C\_R\_N\_P\_D\_R\_E\_L\_R\_P\_W\_C\_F\_T\_T\_D\_P\_N\_K\_R\_W\_E

F C D I P R C T S E \ / P P T I V P E T T C F T G E G G S Y R G  
L\_C\_D\_I\_P\_R\_C\_\ / T\_T\_P P\_P\_S\_S\_G\_P\_T\_Y\_Q\_C\_L\_K\_G\_T\_G\_E\_N\_Y\_R\_G\_

T I A V T E A G K T C Q S W S S Q T P H K H N R T P D N Y P  
N\_V\_A\_V\_T\_V\_S\_G\_H\_T\_C\_Q\_H\_W\_S\_A\_Q\_T\_P\_H\_T\_H\_N\_R\_T\_P\_E\_N\_F\_P\_

C K \ / E  
C\_K\_\ / N L D E N Y C R N P D G K R A P W C H T T N S Q V R W E\_

Y C Q V P T C G D S A G P D D A V I P P E E E  
Y\_C\_K\_I\_P\_S\_C\_D\_S\_S\_P\_V\_S\_T\_E\_Q\_L\_A\_P\_T\_A\_\ / P\_P\_E\_L\_T\_P\_V\_V\_Q

D C Y E D N G S S Y R G I T S Q T V S G K R C Q A W S S M T  
D\_C\_Y\_H\_G\_D\_G\_Q\_S\_Y\_R\_G\_T\_S\_S\_T\_T\_T\_G\_K\_K\_C\_Q\_S\_W\_S\_S\_M\_T\_

P H S H L K T P K N F P N A \ / T S G G I F C R N P D N D R A P  
P\_H\_R\_H\_Q\_K\_T\_P\_E\_N\_Y\_P\_N\_A\_\ / G\_L\_T\_M\_N\_Y\_C\_R\_N\_P\_D\_A\_D\_K\_G\_P\_

W C Y T T N P G V R W E Y C N L E K C S T N A P K P T P G T  
W\_C\_F\_T\_T\_D\_P\_S\_V\_R\_W\_E\_Y\_C\_N\_L\_K\_K\_C\_S\_G\_T\_E A S V V

A T Q P Q S P T T E D S G Q T E R \ / D C K I G N G E T Y R G K  
A\_P\_P\_P\_V\_V\_L\_L\_P\_D\_V\_E\_T\_P\_S\_E\_E\_\ / D\_C\_M\_F\_G\_N\_G\_K\_G\_Y\_R\_G\_K\_

I S I T I L G V T C Q A W S A Q S P H T H N S F T E E T H G  
R\_A\_T\_T\_V\_T\_G\_T\_P\_C\_Q\_D\_W\_A\_A\_Q\_E\_P\_H\_R\_H\_S\_I\_F\_T\_P\_E\_T\_N\_P

D K G L E S N \ / Y C R N P D G D V N G P W C Y T T D P N K K W  
R\_A\_G\_L\_E\_K\_N\_\ / Y\_C\_R\_N\_P\_D\_G\_D\_V\_G\_G\_P\_W\_C\_Y\_T\_T\_N\_P\_R\_K\_L\_Y

D Y C L I P D C A \ / G L K C G S P A I K P K R C F G R I V  
D\_Y\_C\_D\_V\_P\_Q\_C\_A\_\ / A\_P\_S\_F\_D\_C\_G\_K\_P\_Q\_V\_E\_P\_K\_K\_C\_P\_G\_R\_V\_V\_

G G C V S K P H S W P W Q I S L R T S \ / R G I H F C G G T L I  
G\_G\_C\_V\_A\_H\_P\_H\_S\_W\_P\_W\_Q\_V\_S\_L\_R\_T\_R\_\ / F\_G\_M\_H\_F\_C\_G\_G\_T\_L\_I\_

D R Q W V L T A A H C L E K \ / S T R P G Y Y K I V L G I H T E  
S\_P\_E\_W\_V\_L\_T\_A\_A\_H\_C\_L\_E\_K\_\ / S\_P\_R\_P\_S\_S\_Y\_K\_V\_I\_L\_G\_A\_H\_Q\_E\_

R A I E A S K Q L R D L E K L V L G P N G A D I A L L K L Q  
V\_N\_L\_E\_P\_H\_V\_Q\_E\_I\_E\_V\_S\_R\_L\_F\_L\_E\_P\_T\_R\_K\_D\_I\_A\_L\_L\_K\_L\_S

T \ / P A L L N E K V T P V C L P D K D Y I V P S H T E C Y V T  
S\_\ / P\_A\_V\_I\_T\_D\_K\_V\_I\_P\_A\_C\_L\_P\_S\_P\_N\_Y\_V\_V\_A\_D\_R\_T\_E\_C\_F\_I\_T\_

G W G E T Q \ / G T G G N G V L K E A G F P V I E N K I C N R P  
G\_W\_G\_E\_T\_Q\_\ / G\_T\_F\_G\_A\_G\_L\_L\_K\_E\_A\_Q\_L\_P\_V\_I\_E\_N\_K\_V\_C\_N\_R\_Y

A Y L N G R V K D H E M C A G N I E G G T D S C Q \ / G D S G G  
E\_F\_L\_N\_G\_R\_V\_Q\_S\_T\_E\_L\_C\_A\_G\_H\_L\_A\_G\_G\_T\_D\_S\_C\_Q\_\ / G\_D\_S\_G\_G\_

P L V C N S N N R F I L Q G V T S W G L G C A N P M K P G V  
P\_L\_V\_C\_F\_E\_K\_D\_K\_Y\_I\_L\_Q\_G\_V\_T\_S\_W\_G\_L\_G\_C\_A\_R\_P\_N\_K\_P\_G\_V\_  
  
Y A R V S K F I D W I K N T M E L N  
Y\_V\_R\_V\_S\_R\_F\_V\_T\_W\_I\_E\_G\_V\_M\_R\_N\_N\_

FUF7 >fugu factor7 candidate A

(sequence length=398)

HSF7 (44->466=423)>gi|182801|gb|AAA88040.1| coagulation factor VI

(sequence length=423)

Number of matches = 164

Fraction of identities per length = 0.412060

\/ V F M E K P E A N V F L H R T R R A N F L F E E L K A G N L  
/\ V\_F\_V\_T\_Q\_E\_E\_A\_H\_G\_V\_L\_H\_R\_R\_R\_A\_N\_A\_F\_L\_E\_E\_L\_R\_P\_G\_S\_L\_  
  
D R D F K G E K F S Y E G A K E I F A L P Q Q L E S Q G K  
E\_R\_E\_C\_K\_E\_E\_Q\_C\_S\_F\_E\_E\_A\_R\_E\_I\_F\_K\_D\_A\_E\_R\_T\_K\_L\_F\_W\_I\_S  
  
A E Q F I T \/ C K L S P C K N G A T C T R R F E T Y A C K C A  
Y S /\ D G D Q C\_A\_S\_S\_P\_C\_Q\_N\_G\_G\_S\_C\_K\_D\_Q\_L\_Q\_S\_Y\_I\_C\_F\_C\_L  
  
N G F H G H N C D Q \/ V R R T S N G C R Y R N G G C E H F C R  
P\_A\_F\_E\_G\_R\_N\_C\_E\_T /\ H K D D Q L I C\_V\_N\_E\_N\_G\_G\_C\_E\_Q\_Y\_C\_S  
  
E F P D R S Y V C F C A P G Y R L D K D N S T C L P \/ Q V K V  
D H T G T K R S C\_R\_C\_H\_E\_G\_Y\_S\_L\_L\_A\_D\_G\_V\_S\_C\_T\_P\_/\ T V\_E\_Y  
  
P C G R L Q I L F S P R V I N G L I C P K G H  
P\_C\_G\_K\_I\_P\_I\_L\_E\_K\_R\_N\_A\_S\_K\_P\_Q\_G\_R\_I\_V\_G\_G\_K\_V\_C\_P\_K\_G\_E  
  
C P W Q \/ A M L S E N N I Y T C G A I I L S E Q W V L T A A H  
C\_P\_W\_Q\_/\ V L L\_L\_V\_N\_G\_A\_Q\_L\_C\_G\_G\_T\_L\_I\_N\_T\_I\_W\_V\_V\_S\_A\_A\_H  
  
C V W R K P A H L F N V T V \/ G E H D R E I F E K T E Q H R  
C\_F\_D\_K\_I\_K\_N\_W\_R\_N\_L\_I\_A\_V\_L /\ G\_E\_H\_D\_L\_S\_E\_H\_D\_G\_D\_E\_Q\_S\_R\_  
  
R V I K V L I H P G Y N K T S S D K D L A M L K L H R P V K  
R\_V\_A\_Q\_V\_I\_I\_P\_S\_T\_Y\_V\_P\_G\_T\_T\_N\_H\_D\_I\_A\_L\_L\_R\_L\_H\_Q\_P\_V\_V  
  
L G L Y V V P I C L P A Q N S T I S R T L A N I R Q S T V S  
L\_T\_D\_H\_V\_V\_P\_L\_C\_L\_P\_ E R T F S E R T\_L\_A\_F\_V\_R\_F\_S\_L\_V\_S\_  
  
G W G R L S R F G P P A T I L Q R L T L P R V P L Q E C  
G\_W\_G\_Q\_L\_L\_D\_R\_G\_A\_T\_A\_L\_E\_L\_M\_V\_L\_N\_V\_P\_R\_L\_M\_T\_Q\_D\_C\_L\_Q  
  
R L H T K L N I T R N M L C A G L K T G G R D A C E G  
Q\_S\_R\_K\_V\_G\_D\_S\_P\_N\_I\_T\_E\_Y\_M\_F\_C\_A\_G\_Y\_S\_D\_G\_S\_K\_D\_S\_C\_K\_G\_  
  
D S G G P L V T Y Y K K T W F L T G V V S W G K G C A N E N  
D\_S\_G\_G\_P\_H\_A\_T\_H\_Y\_R\_G\_T\_W\_Y\_L\_T\_G\_I\_V\_S\_W\_G\_Q\_G\_C\_A\_T\_V\_G  
  
L Y G V Y V R V T N F L D W I G N I I A T N  
H\_F\_G\_V\_Y\_T\_R\_V\_S\_Q\_Y\_I\_E\_W\_L\_Q\_K\_L\_M\_R\_S\_E\_P\_R\_P\_G\_V\_L\_L\_R

A P F P

FUF9 >fugu factor 9 from scaff1343  
(sequence length=473)

HUF9 >gi|22385321|gb|AAM96188.1| coagulation factor IX  
(sequence length=461)

Number of matches = 215

Fraction of identities per length = 0.466377

```
M A R D F L L A L I A A L L L E V S      G L P T E G S T G \ / V
M_Q_R_V_N M I M A E S P G L_I T I C L L G_Y L L S A E C T / \ V_

F V S P Q A A N M V L L R Q R R Y N S G H L E E L Q K D N L
F_L D H E N A_N_K I L_N R_P K R_Y_N_S_G_K L_E_E_F V Q G N_L_

E R E C K E E Q C T M E E A R E V F E D D E K T \ /
E_R_E_C_M_E_E_K_C_S F E_E_A_R_E_V_F_E_N_T_E_R_T_ / \ T E F W K Q

  V D G D Q C V P P P C Q N E G V C K D G I N S Y V C W C K
Y_V_D_G_D_Q_C_E_S N P_C_L_N_G_G_S_C_K_D_D I_N_S_Y_E_C_W_C_P

P D F S G R N C E I \ / E V S K Q C S V N N G G C S H F C V M Q
F_G_F_E_G_K_N_C_E_L / \ D V_T      C_N_I_K_N_G_R_C_E_Q_F_C_K_N_S

G D I S   V C H C A V G H R L G L D K K S C E P T D \ / Q F S C
A_D_N_K V V_C_S_C_T E G_Y_R_L_A E N Q K_S_C_E_P_A V / \ P_F_P_C_

G H I N M S F S S K S N V Q R R S L M Q K L E A N R T F S S
G_R_V_S V_S_Q T S_K_      L T R_              A_E_T_V_F_P_D

I L L G D Y S D N S T E L \ / D P Y W A F P T L P T I P E K E N
V      D_Y_V   N_S_T_E_A   E T I L D N I T_Q S T_Q S F N D F

T D Q R I V G G D E A L P G E I P W Q   V Q L N P P \ / A E P F C
T_   R_V_V_G_G_E D A_K_P_G_Q_F_P_W_Q_ / \ V_V_L_N_G_K   V D A F_C_

G G S L L S D L W V I T A A H C L I N E K I A K Q G Y F I R
G_G_S_I V N E K W_I V T_A_A_H_C_V      E_T_G_V_K_I_T   V V

V G \ / E H   D V S K D E G P E R D H T V A E Q H I H F M Y D Y K
A_G_   E_H_ / \ N I E E T E_H T E_Q K R N V_I R I I P H_H N Y_N A A

K S P Y N H D I A L L K L N K P V E L S N K R R P I C L G P
I N K Y_N_H_D_I_A_L_L_E_L_D E P_L V L_N S Y V T P_I_C_I A D

K D F T E T L L R E S T S S L V S G W G R I K F F G L E A T
K_E_Y_T_N_I F L_K   F G S_G_Y_V_S_G_W_G_R_V F H K G_R S A_L

K L Q K L E V P Y V D R T R C K Q S S R E Q V T R Y M F C A
V_L_Q_Y_L_R_V_P_L V_D_R_A T C_L R S_T K F T I Y N N M_F_C_A_

G Y Q L Q A K D S C Q G D S G G P H A T K Y K D T W F L T G
G_F_H_E_G_G_R_D_S_C_Q_G_D_S_G_G_P_H_V_T_E_V_E_G_T_S_F_L_T_G_
```

I V S W G E E C A K D G K Y G I Y T R V S R Y Y P W I S Q K  
I I S W G E E C A M K G K Y G I Y T K V S R Y V N W I K E K

T G L  
T K L T

FUA2 >fugu uPA on scaf3932  
(sequence length=454)  
HUPA >human urokianase  
(sequence length=431)

Number of matches = 175  
Fraction of identities per length = 0.406032

M T F W R V L A A A F A I L T T A E A V R T L L H \\  
M R A L L A R L L C V L V V S D S K G S N E L H Q V P S /\ N  
C G L C L H G G T S V P S L T S G E H M F C L C A D G F Q G  
C D C L N G G T C V S N K Y F S N I H W C N C P K K F G G  
K N C E T \ V K N S Q C Y E G V G L F Y R G T A S Q S E S G R  
Q H C E I /\ D K S K T C Y E G N G H F Y R G K A S T D T M G R  
T C R V W D P Q T R E S Y L A S D I N S G R H  
P C L P W N S A T V L Q Q T Y H A H R S D A L Q L G L G K H  
N Y C R \ N L H F R R R P W C Y V T K N Q Q L L W E Y C A V P  
N Y C R /\ N P D N R R R P W C Y V Q V G L K P L V Q E C M V H  
R C S S D L C R C I P V P Q K K N A L R V C D R G V L N L R  
D C A D G /\ K K  
C P H F A A P S Q A P P T P A H P A T \ S A C G Q R R R R K Q  
P S S P P E E L K F Q C G Q K T L R P R  
M K I V G G T V A T V E S H P W V A A I F W R A K S K E K V  
F K I I G G E F T T I E N Q P W F A A I Y R R H R G G S V T  
F R C G G S L I S S C W V L T A A H C F P D G \ S H L K T R R  
Y V C G G S L M S P C W V I S A T H C F /\ I D Y P K K E D  
F S V V L G K N A L N E S K S T T E Q K F G V E Q I I V H R  
Y I V Y L G R S R L N S N T Q G E M K F E V E N L I L H K  
D F D N T D G N F N N D I \ A L L K L K S T R G T C A K K S R  
D Y S A D T L A H H N D I /\ A L L K I R S K E G R C A Q P S R  
T V G S V C L P Q H L L Q P G L T C E I A G Y G K E Q H \\  
T I Q T I C L P S M Y N D P Q F G T S C E I T G F G K E N S /\  
G S W F R T Q Y L R E T Q V N V I S D D V C R Q E D Y Y G N  
T D Y L Y P E Q L K M T V V K L I S H R E C Q Q P H Y Y G S  
L I T S N M F C A G Q P D W S R D A C K \ G D S G G P L V C E  
E V T T K M L C A A D P Q W K T D S C Q /\ G D S G G P L V C S

V N G R L F L F G V I S W G D G C A K E F R P G V Y T R V T  
L Q G R M T L T G I V S W G R G C A L K D K P G V Y T R V S

N Y L R W I E E K V S G S M L V E K  
H F L P W I R S H T K E E N G L A L

FUF7 >fugu f7 candidate B  
(sequence length=428)

HSF7 (44->466=423)>gi|182801|gb|AAA88040.1| coagulation factor VI  
(sequence length=423)

Number of matches = 187  
Fraction of identities per length = 0.442080

\/ V F L D A D K A H D V L V R T R R Y N S G W L E E L Q K G D  
/\ V\_F\_V\_T\_Q\_E\_E\_A\_H\_G\_V\_L\_H\_R\_R\_R\_ A N A F L\_E\_E\_L\_R\_P\_G\_S  
  
L K R E C L E E I C S Y E E A R E V F E H T K T T \/ R Y L P E  
L\_E\_R\_E\_C\_K\_E\_E\_Q\_C\_S\_F\_E\_E\_A\_R\_E\_I\_F\_K\_D\_A\_E\_R\_T\_ K L  
  
S D D Y Y V H H F F G P N S C K S N P C L N G G S C S A E G  
F W I S Y S /\ D G D Q C\_A\_S\_S\_P\_C\_Q\_N\_G\_G\_S\_C\_K\_D\_Q\_L  
  
S S Y T C F C L P E F S G V D C E L \/ E Y Q T V P D T C L L E  
Q\_S\_Y\_I\_C\_F\_C\_L\_P\_A\_F\_E\_G\_R\_N\_C\_E\_ /\ T H K D D Q L I C\_V\_N\_E\_  
  
N G G C E H F C H E N S A G R R G N C S C A D G Y D L D V D  
N\_G\_G\_C\_E\_Q\_Y\_C\_S\_D\_H\_T\_G\_T\_K\_R\_ S\_C\_R\_C\_H\_E\_G\_Y\_S\_L\_L\_A\_D\_  
  
G L S C K A K \/ E S V A C G M V L S T Q F E H N Q L N P R A R  
G\_V\_S\_C\_T\_P\_T /\ V E Y P C\_G\_K\_I\_P\_I\_L\_E K R N\_A\_S\_K\_P\_Q\_G\_R\_  
  
I V G G N E C P K G E C P W Q \/ V L L V Y K G K G F C G G V I  
I\_V\_G\_G\_K\_V\_C\_P\_K\_G\_E\_C\_P\_W\_Q /\ V\_L\_L\_L\_V\_N\_G\_A\_Q\_L\_C\_G\_G\_T\_L  
  
Y K P T W I L T A S H C M A D I D V Q F L K V V A \/ G E H N  
I N T I W\_V\_V\_S\_A\_A\_H\_C\_F\_D\_K\_I\_K\_N\_W\_R\_N\_L\_I\_A\_V\_L /\ G\_E\_H\_D  
  
T E V D E G T E Q I I Q V S E I I M H E K Y V P R T A D N D  
L S E H D G\_D\_E\_Q\_S\_R\_R\_V\_A\_Q\_V\_I\_I\_P\_S\_T\_Y\_V\_P\_G\_T\_T\_N\_H\_D\_  
  
I A L L H L A V P I T Y T T Y A I P V C L P T R P L A E R E  
I\_A\_L\_L\_R\_L\_H\_Q\_P\_V\_V\_L\_T\_D\_H\_V\_V\_P\_L\_C\_L\_P\_E\_R\_T\_F\_S\_E\_R\_T  
  
L W A V S L H T V S G W G R R S E N G P T S H L L R Q L K V  
L\_A\_F\_V\_R\_F\_S\_L\_V\_S\_G\_W\_G\_Q\_L\_L\_D\_R\_G\_A\_T\_A\_L\_E\_L\_M\_V\_L\_N\_V\_  
  
P R I R T Q Q C I E E S G V V L T Q N M F C A G Y  
P\_R\_L\_M\_T\_Q\_D\_C\_L\_Q\_Q\_S\_R\_K\_V\_G\_D\_S\_P\_N\_I\_T\_E\_Y\_M\_F\_C\_A\_G\_Y\_  
  
M E G R Q D S C K G D S G G P L V T K Y K K T V F L L G I V  
S D G\_S\_K\_D\_S\_C\_K\_G\_D\_S\_G\_G\_P\_H\_A\_T\_H\_Y\_R\_G\_T\_W\_Y\_L\_T\_G\_I\_V\_  
  
S W G K G C A R P G N Y G I Y T R V A N Y L E W I H N R T A  
S\_W\_G\_Q\_G\_C\_A\_T\_V\_G\_H\_F\_G\_V\_Y\_T\_R\_V\_S\_Q\_Y\_I\_E\_W\_L\_Q\_K\_L\_M\_R

T V N Q P T N N T E N F T T  
S E P R P\_G V L L R A P F\_P

FUF9 >fugu f9 candidate from scaf917  
(sequence length=476)

HUF9 >gi|22385321|gb|AAM96188.1| coagulation factor IX  
(sequence length=461)

Number of matches = 196

Fraction of identities per length = 0.425163

M D L F R L P F S C L L L V A L Q L D Y S \ / A P L  
M Q R V N M I M A E S P G L\_I T I C L\_L G Y L L\_S A E C T / \ V  
  
F L P A E V A G S V L Q R P K R A N I G V F E E W L E G N L  
F\_L\_D H E\_N A\_N K I L\_N R\_P\_K\_R\_Y N\_S G\_K L E\_E F V Q G\_N\_L\_  
  
E R E C L E E T C D L E E V R E V F E D D E K T \ / S V M S R V  
E\_R\_E\_C\_M\_E\_E\_K\_C\_S F E\_E\_A R\_E\_V\_F\_E\_N\_T\_E\_R\_T\_ / \ T E F W K Q  
  
L L V P S D G N Q C D S N P C L N Q G S C E D L L G S Y T C  
Y V D\_G\_D\_Q\_C\_E S\_N\_P\_C\_L\_N\_G G\_S\_C\_K D\_D I N S\_Y\_E\_C\_  
  
T C L P G F A G K D C E I \ / A K R C D V N N G D C A H F C E P  
W\_C\_P\_F\_G\_F\_E\_G\_K\_N\_C\_E\_L / \ D V T C\_N I K N\_G\_R\_C\_E\_Q\_F\_C\_K\_N  
  
L G A F G A K C S C A T G Y R V T D D G L D C Q P \ / E T E F P  
S A D N K V V C\_S\_C\_T E G\_Y\_R\_L A E N Q K S C\_E\_P\_ / \ A V P F\_P\_  
  
C G K T A L M Q V N S A F R R T L L G R L D S S L E N D T A  
C\_G\_R\_V\_S\_V\_S\_Q\_ T S\_K L T\_R\_A E T V F P D\_V D Y V N\_S T\_E  
  
P D N \ / T N D T T L P G D E E P E P Y R R I V G G D L V I P G  
A E / \ T I L D\_N I T Q S T Q S F N D F T R\_V V\_G\_G\_E D A K P\_G\_  
  
E I P W Q \ / V A L M Q R S T G E V F C G G S I L S E R W V I T  
Q F\_P\_W\_Q\_ / \ V\_V L\_ N G K V D A F\_C\_G\_G\_S\_I\_V N E\_K W\_I V T\_  
  
A A H C L L E E K V S F Y I R V \ / G E H T L S I Q E G T E Q N  
A\_A\_H\_C\_ V E\_T G V\_K I T V V A G\_E\_H\_ / \ N I E E T E\_H T\_E\_Q\_K  
  
Y D V L E Q H L H P L Y N A S I S L Y D H D I A L I Y L K S  
R N V\_I R I I P H\_H N Y\_N\_A\_A I\_N K Y\_N H\_D\_I\_A\_L\_L E L\_D E  
  
P I A F S A N V R P I C I G P R A F T E F L I K S Y S P A R  
P\_L V L N S Y V\_T P\_I\_C\_I\_A D K E Y T\_N I F L K\_ F G S G Y  
  
V S G W G R T R Y L G L T A D S L Q K V D V P F T I R T E C  
V\_S\_G\_W\_G\_R\_V F H K G\_R S A\_L V L\_Q\_Y L R V\_P\_L V D R\_A T C\_  
  
K H S S S N R I T P Y M F C A G Y K D E A K D A C Q G D S G  
L R S\_T K F T I\_Y N N M\_F\_C\_A\_G\_F H E G G R D\_S\_C\_Q\_G\_D\_S\_G\_  
  
G P H T N S I R D T W F L T G I V S W G E E C A K E G K Y G  
G\_P\_H\_V T E V E G T\_S F\_L\_T\_G\_I\_I S\_W\_G\_E\_E\_C\_A M K G\_K\_Y\_G\_

V Y T R V S L Y Y H W I K Y V M G S T K K R L A F D V E N P  
I Y T K V S R Y V N W I K E K T K L T

D E

FUA1 >fugu uPA on scaf4367  
(sequence length=392)  
HUPA >human urokinase  
(sequence length=431)

Number of matches = 164  
Fraction of identities per length = 0.418367

M K L L V I L V I F V A F C S D V V S R N L E D I T S  
M\_R A L\_L A R L L\_L C V L V V S D S K G S\_N E L\_H Q V P S\_/\ N  
C L G \/  
C D C\_L\_N G G T C V S N K Y F S N I H W C\_N C\_P K K F G G Q  
A T E T C W P G E R S S Y T G D V S K S L G G R R  
H C E I /\ D K S K T\_C\_Y E G\_N G H F Y\_R G\_K A S\_T D T M G\_R\_P  
C L N W R N V F N P W G D S N G I G D H N  
C\_L\_P W\_N S A T V L Q Q T Y H A H R S D\_A L Q L G\_L G\_K H\_N  
Y C R \/\ N P D Q S G R P W C Y V R R G R R I V W E F C V V P M  
Y\_C\_R\_/\ N\_P\_D\_N R R R\_P\_W\_C\_Y\_V\_Q V G\_L K P L V Q E C\_M V\_H D  
C K P D \/\ F S E L I L G V F A A L S C G E R Q E Q R T N K I V  
C\_A D G /\ K K P S S P P E E L K F Q C\_G\_Q K T L R P R F K\_I\_I  
N G S F A D V E S H P W I A A I F G Q R S L C G  
G\_G\_E\_F\_T T I E\_N Q P\_W\_F A\_A\_I\_Y R R H R G G S V T Y V C\_G  
G S L I S P C W V V T A A H C F D D G \/\ D A T D I R Q L S V H  
G\_S\_L\_M\_S\_P\_C\_W\_V\_I S A\_T H\_C\_F\_/\ I D\_Y P K K E D Y I V\_Y  
L G K K A I N E T N A K K E Q A F L V E K L I I H Q H F D S  
L\_G\_R S R L N\_ S N\_T Q G E\_M K F\_E V\_E\_N L\_I\_L H\_K D Y S A  
S D L N N D I \/\ A L L K I K R R D G S C A A K S A S A R V  
D T L\_A H H N\_D\_I\_/\ A\_L\_L\_K\_I\_R S K E G\_R C\_A\_Q P S\_R T I Q T  
V C L P P L R T Q L P A G F Q C T V A G Y G H E S Y \/\ R T Y S  
I C\_L\_P\_S M Y N D P Q F G\_T S C\_E I T G\_F G\_K E\_N S /\ T D Y\_L  
Y S Q Y L K K T E V K L I S H S L C Q S P S Y Y G K R I T D  
Y\_P\_E Q L\_K\_M T\_V V\_K\_L I S\_H R E C\_Q\_Q P\_H Y\_Y\_G\_S E V T\_T  
N M L C A G S P D W T T D S C \/\ Q G D S G G P L V C E A A G R  
K M\_L\_C\_A\_A D P\_Q W\_K T\_D\_S\_C\_/\ Q\_G\_D\_S\_G\_G\_P\_L\_V\_C\_S L Q G\_R  
M F L F G V V S W G D E C A K K N K P G V Y T Q V T N Y N K  
M\_T L\_T G\_I V\_S\_W\_G\_R G C\_A\_L K\_D K\_P\_G\_V\_Y\_T\_R V\_S H F L P

W I A D E T G L S E Y T K G L M Y P E K  
W\_I\_R\_S\_H\_T\_ K E E N G\_L\_A\_L

FF7C >fugu f7 candidate C  
(sequence length=426)

HSF7 (44->466=423)>gi|182801|gb|AAA88040.1| coagulation factor VI  
(sequence length=423)

Number of matches = 173

Fraction of identities per length = 0.408983

```
\\ V F V E R D D A S T V L Q R R R R A N S G F L E E M Q Q G N  
/\ V_F_V_T_Q_E_E_A_H_G_V_L_H_R_R_R_R_A_N_ A_F_L_E_E_L_R_P_G_S  
  
L K R E C I E E I C N Y E E A R E V F E D D A Q T \\  
L_E_R_E_C_K_E_E_Q_C_S_F_E_E_A_R_E_I_F_K_D_A_E_R_T_ K L F W I  
  
S G H D P C S V M P C Q N N G V C V S M G N T Y Q C H C  
S Y /\ S_D_G_D_Q_C_A_S_S_P_C_Q_N_G_G_S_C_K_D_Q_L_Q_S_Y_I_C_F_C_  
  
P E G F G G Q R C E T \\  
L_P_A_F_E_G_R_N_C_E_T_/\ H K D D_Q_L_I_C_V_N_E_N_G_G_C_E_Q_Y_C_  
  
D G S G A S R K C F C A H G Y T L A S D G R Q C I A E \\  
S_D_H_T_G_T_K_R_S_C_R_C_H_E_G_Y_S_L_L_A_D_G_V_S_C_T_P_T_/\ V_E_  
  
F P C G Q L P P P E T G P D Q T V V G Q T R L V G T N H C P  
Y_P_C_G_K_I_P_I_L_E_K R N A S K P Q_G_R_I_V_G_G_K_V_C_P_  
  
K G E C P W Q \\  
K_G_E_C_P_W_Q_/\ V_L_L_L_V_N_G_A_Q_L_C_G_G_T_L_I_N_T_I_W_V_V_S  
  
A A H C V T G K Q P Q H L S V V A G N R S L N \\  
A_A_H_C_ F D K I K N W R_N_L_I A V L_/\ L P G E  
G_E_  
  
H N L D N D D G T E Q K I P V A R V F A H E G Y V S E T G D  
H_D_L_S_E_H_D_G_D_E_Q_S_R_R_V_A_Q_V_I_I_P_S_T_Y_V_P_G_T_T_N  
  
K D I A L L H L N A S V T L N R G V I P V C L P T K D L A E  
H_D_I_A_L_L_R_L_H_Q_P_V_V_L_T_D_H_V_V_P_L_C_L_P_E_R_T_F_S_E_  
  
R E L L M T R Y H T V S G W G K R T N G G N E D H G V V N T  
R_T_L_A_F_V_R_F_S_L_V_S_G_W_G_Q_L_L_D_R_G_A_T_A_L_E_L_M V  
  
A P V S P F L R K F S V P I I P N P Q C S H R S Q F N F T D  
L_N_V_P_R_L_M_T_Q_D_C_L_Q Q S R K V G D S P N_I_T_E  
  
N M L C A G Y L E G N Q Q S C R G D D G S P L V T L Y G S T  
Y_M_F_C_A_G_Y_S_D_G_S_K_D_S_C_K_G_D_S_G_G_P_H_A_T_H_Y_R_G_T_  
  
H F L I G V V G W G R G C P N P G Y Y G V Y T N M G N F V D  
W_Y_L_T_G_I_V_S_W_G_Q_G_C_A_T_V_G_H_F_G_V_Y_T_R_V_S_Q_Y_I_E  
  
W A N G I M M A A N K A S T  
W_L_Q_K_L_M_R_S_E_P_R_P_G_V_L_L_R_A_P_F_P
```
